# Supplementary material for: Insights into the high temporal variability of atmospheric carbon dioxide (CO 2 ) at a suburban station in the Indo-Gangetic Plain
Source: Copernicus journal article supplement (doi:10.5194/egusphere-2025-3538), 2025-09-29
Supplement: Supplementary file 1 [file egusphere-2025-3538-supplement-version4.pdf]

1 **Measurement report: Insights into the high temporal variability of**  
2 **atmospheric carbon dioxide (CO<sub>2</sub>) at a suburban station in the Indo-**  
3 **Gangetic Plain**

4

5 Vimal Jose Vazhathara<sup>1, \*</sup>, Ravi Kumar Kunchala<sup>1</sup>, Sajeev Philip<sup>1</sup>, Jaswant Rathore<sup>1</sup>, Dilip  
6 Ganguly<sup>1</sup>, Sagnik Dey<sup>1,2</sup>, [Tomoki Nakayama<sup>3</sup>](#), Yutaka [Matsumi<sup>4,5</sup>](#) and Prabir K. [Patra<sup>4,6</sup>](#)

7

8 <sup>1</sup>Centre for Atmospheric Sciences, Indian Institute of Technology Delhi, New Delhi, India.

9 <sup>2</sup>Centre of Excellence for Research on Clean Air, Indian Institute of Technology Delhi, New  
10 Delhi, India

11 [<sup>3</sup>Graduate School of Integrated Science and Technology, Nagasaki University, 1-14 Bunkyo-](#)  
12 [machi, Nagasaki, Nagasaki, 852-8521, Japan](#)

13 [<sup>4</sup>Research Institute for Humanity and Nature, Kyoto, Japan](#)

14 [<sup>5</sup>Institute for Space-Earth Environmental Research, Nagoya University, Nagoya, Japan](#)

15 [<sup>6</sup>Japan Agency for Marine-Earth Science and Technology \(JAMSTEC\), Yokohama, Japan.](#)

16 \*Correspondence to: Vimal Jose Vazhathara (vimaljosevazhathara@gmail.com), Centre for  
17 Atmospheric Sciences, Indian Institute of Technology Delhi, New Delhi, 110016, India

18

19 **Abstract**

20 The unusual weather patterns and large anthropogenic emissions over the Indo-Gangetic Plain  
21 (IGP) make it a significant hotspot of greenhouse gases like carbon dioxide (CO<sub>2</sub>). Given the  
22 significance of the IGP and highly populated Delhi National Capital Region (Delhi-NCR), a  
23 GHG observatory was established at a suburban monitoring station in Sonipat, Haryana  
24 (28.95°N, 77.10°E; 228m asl), about 45 km north of the Delhi state boundary. Using a laser-  
25 based cavity ring-down spectroscopy (CRDS) technique, we measured CO<sub>2</sub> mole fraction from  
26 February 2023 to January 2025. An annual average CO<sub>2</sub> mole fraction of 440.8±19.7 parts per  
27 million (ppm) was recorded in 2024, which includes a strong seasonal variability, ranging from

Deleted: Matsumi<sup>3,4</sup>

Deleted: Patra<sup>3,5</sup>

Deleted: <sup>3</sup>Research

Deleted: <sup>4</sup>Institute

Deleted: <sup>5</sup>Japan

33 422.6±23.3 ppm during the monsoon (June- September) to 456.4±30.8 ppm in post-monsoon  
34 (October -November). A strong CO<sub>2</sub> diurnal amplitude of 29 ppm in May and 63 ppm in  
35 October was observed mainly due to seasonal changes in boundary layer mixing (faster in May  
36 than October) and biospheric activity (weaker in May than October). Further investigation of  
37 the drivers of strong seasonal and diurnal CO<sub>2</sub> variability over IGP revealed a strong contrast  
38 to other global monitoring stations in the same latitude band. A strong correlation between CO<sub>2</sub>  
39 and methane (CH<sub>4</sub>) indicated a co-located emission source, while the strong positive correlation  
40 between CO<sub>2</sub> and carbon monoxide (CO) during post-monsoon emerges due to emissions from  
41 biomass burning. We demonstrated that the high temporal CO<sub>2</sub> variability in the IGP region is  
42 driven by the complex interplay of local anthropogenic and biomass burning emissions,  
43 biospheric fluxes, and prevailing meteorology.

44

## 45 1. Introduction

46 Carbon dioxide (CO<sub>2</sub>) is the major greenhouse gas (GHG) contributing to climate change and  
47 global warming ( IPCC, 2021; Fawzy et al., 2020). Due to the long lifetime and high radiative  
48 forcing potential, CO<sub>2</sub> can have a significant impact on global and regional climate (Wang et  
49 al., 2010). The atmospheric CO<sub>2</sub> mole fraction has increased from 278 parts per million (ppm)  
50 in the pre-industrial period to 427 ppm in 2025 (NOAA, <https://gml.noaa.gov>; Wigley (1983).  
51 This rapid increase in the atmospheric fraction of CO<sub>2</sub> is primarily due to the combustion of  
52 fossil fuels, cement manufacture, deforestation, and other industrial processes ( Stocker et al.,  
53 2013; Huang et al., 2016; Yoro and Daramola, 2020). A comprehensive understanding of the  
54 sources and sinks of CO<sub>2</sub> is critical for developing national policies to mitigate climate change  
55 impacts.

56 India is the third-highest CO<sub>2</sub>-emitting nation (8% of total global CO<sub>2</sub>) in the last  
57 decade, as reported by the Global Carbon Project (GCP) (Friedlingstein et al., 2025; Le Quéré  
58 et al., 2018). In particular, the Indo-Gangetic Plain (IGP) region is one of the hotspots of  
59 atmospheric CO<sub>2</sub> mole fraction, primarily due to large fossil fuel emissions and adverse  
60 meteorology (Halder et al., 2021; Krishnapriya et al., 2025; Kuttippurath et al., 2022). Over the  
61 past few decades, the IGP region has witnessed rapid urbanisation, industrialisation, and  
62 agricultural intensification, leading to significant changes in land-use patterns and GHG  
63 emissions (Yoro and Daramola, 2020). Mitigation of anthropogenic CO<sub>2</sub> emissions in the  
64 highly populated IGP region is crucial to reducing the build-up of atmospheric CO<sub>2</sub> mole

Deleted: to

Deleted:

67 fractions. Gaining a better understanding of the magnitude of CO<sub>2</sub> sources and sinks and the  
68 local drivers of CO<sub>2</sub> temporal variability over the IGP region is therefore important.

69  
70 Continuous monitoring of ground-based CO<sub>2</sub> is of utmost importance for inverse  
71 modelling approaches to understand local-to-regional-scale sources and sinks of CO<sub>2</sub>.  
72 Although GHG mole fractions have been monitored worldwide for decades, GHG monitoring  
73 stations in India are limited (Kunchala et al., 2025; Chakraborty et al., 2020; Kumar et al.,  
74 2021; Patra et al., 2013; Tiwari et al., 2013). The Cape Rama (15.08° N, 73.83° E) station,  
75 situated on India's southwest coast, was the first Indian monitoring station to track CO<sub>2</sub> mole  
76 fraction from 1993 to 2002 (Bhattacharya et al., 2009; Patra et al., 2011; Rayner et al., 2008).  
77 Recently, several monitoring stations have been established over different parts of India to  
78 measure the GHGs (Chandra et al., 2016; Jain et al., 2021; Mahesh et al., 2015; Metya et al.,  
79 2021; Nomura et al., 2021; Pathakoti et al., 2023; Sreenivas et al., 2016; Thilakan et al., 2023;  
80 Tiwari et al., 2014). Studies have also been conducted using aircraft-based measurements  
81 (Niwa et al., 2012; Patra et al., 2011; Schuck et al., 2012; Zhang et al., 2007) and satellite data  
82 products (Das et al., 2023; Kunchala et al., 2022; Nalini et al., 2019; Philip et al., 2022; Xiong  
83 et al., 2009). The incorporation of regional in situ and aircraft-based measurements, along with  
84 satellite columnar CO<sub>2</sub> retrievals, reduced uncertainties in top-down CO<sub>2</sub> flux estimates (Huang  
85 et al., 2008; Niwa et al., 2012; Zhang et al., 2014).

86 To comprehensively understand temporal CO<sub>2</sub> variability and its drivers in the western  
87 IGP region, we have conducted atmospheric CO<sub>2</sub> mole fraction measurements at Sonipat, a  
88 suburban station in the IGP region upwind of Delhi. The continuous measurements from  
89 February 2023 to January 2025 were conducted using laser-based cavity ring-down  
90 spectroscopy. Here, we investigate the novel characteristics of the seasonal and diurnal  
91 variability of atmospheric CO<sub>2</sub> mole fraction at Sonipat. We then identify the key drivers of  
92 the observed temporal CO<sub>2</sub> variability in the region.

93

## 94 **2. Materials and methods**

### 95 **2.1 Monitoring station**

96 The measurements in this study were carried out at the Indian Institute of Technology Delhi  
97 (IIT Delhi) Centre for Atmospheric Sciences (CAS) - Atmospheric Observatory situated at  
98 Sonipat campus (28.95°N, 77.10°E, 228m asl). Sonipat is an upwind suburban region of the  
99 Delhi-NCR, situated in the northern Indian state of Haryana, approximately 45 kilometres north  
100 of Delhi. The monitoring station is surrounded by agricultural fields, a National Highway, and

101 academic institutions (Rathore et al., 2025). Figure 1 shows the location map of the monitoring  
102 station. The climatic conditions over this site are similar to Delhi which has sweltering  
103 summers (March-May), damp or moist monsoons (June - September), and extreme winters.  
104 Similar to Delhi, this region also has frequent haze and smog with low visibility during winter  
105 (December - February) and post-monsoon (October - November) seasons. During the post-  
106 monsoon season, Sonipat experiences large transport of pollutants from the North-West  
107 direction. In addition to the pollutant transport, several local emission sources exist in the  
108 region, such as small industries, vehicular sources, and local biomass burning affecting short-  
109 lived air pollutants (Rathore et al., 2025).

110

## 111 **2.2 Local measurements**

### 112 **2.2.1 GHG measurements**

113 This study utilised the PICARRO G2301 GHG analyser to measure major atmospheric GHG  
114 mole fractions. The PICARRO analyser employs the Cavity Ring-Down Spectroscopy (CRDS)  
115 technique at 0.5 Hz to measure CO<sub>2</sub> mole fraction. The CRDS technique utilises the ring-down  
116 time of light intensity within the cavity to determine the mole fraction of CO<sub>2</sub>, a method  
117 fundamentally different from other measurement techniques such as Non-dispersive Infrared  
118 Spectroscopy (NDIR) and Fourier Transform Infrared Spectroscopy (FTIR). The long sample  
119 interaction path length (approximately 20 km) is a characteristic of CRDS, which enhances  
120 sensitivity compared to conventional techniques based on light-intensity absorption. The cavity  
121 pressure operates at a very low pressure of 140 Torr. This isolates a single spectral feature with  
122 a resolution of 0.0003 cm<sup>-1</sup>, ensuring a linear relationship between peak height or area and mole  
123 fraction. The CRDS provides precise, highly sensitive measurements of gases in ambient air  
124 with a temporal resolution of 5 seconds. The technique has been well validated for measuring  
125 atmospheric CO, CO<sub>2</sub>, and CH<sub>4</sub> mole fractions globally and at some Indian monitoring stations  
126 (Chandra et al., 2016; Chen et al., 2013; Jain et al., 2021).

127 The standard cavity temperature of 45°C (throughout the measurement period) ensures  
128 the necessary etalon mechanical stability of the measurement cavity. The sample air was taken  
129 from the top of the building and above the tree canopy (5 meters above the instrument housing)  
130 through a Teflon (PTFE) tube with an inner diameter of 3 mm using an external vacuum pump  
131 with ~400 SCCM flow rate (residence time ~5.9 s). The air intake height is about 248 m.

132 The Sonipat station, lying on the upwind side of Delhi, is a suburban station with  
133 relatively cleaner air compared to the urban city centre. However, Sonipat cannot be considered  
134 a pristine site due to the impact of local emissions from nearby industries and national

135 highways. We adopted (1) the fifth percentile of the daily data to characterise background mole  
136 fraction at the site (Ammoura et al., 2014; Chandra et al., 2016; Jain et al., 2021), and (2) the  
137 adaptive diurnal minimum variation selection (ADVS) method that considers the diurnal  
138 minimum value as the daily background value (Apadula et al., 2019; Yuan et al., 2018). In this  
139 study, the comparison between the fifth percentile and the ADVS methods showed similar CO<sub>2</sub>  
140 background values (see Fig. S1), and the ADVS method was used for further analysis. The  
141 excess CO<sub>2</sub> mole fractions were then estimated by subtracting the hourly averaged values of  
142 CO<sub>2</sub> from the background mole fraction.

143 The measurements of the atmospheric CH<sub>4</sub> mole fraction were also conducted with the  
144 PICARRO G2301 GHG analyser. The GHG analyser employs the CRDS at 0.5 Hz to measure  
145 CH<sub>4</sub> mole fraction. The mole fractions of CH<sub>4</sub> were determined using the ring-down time of  
146 light intensity, similar to CO<sub>2</sub> mole fractions. Calibration was performed following the  
147 guidelines of the National Oceanic and Atmospheric Administration Earth System Research  
148 Laboratories (NOAA-ESRL, 2020) and the Integrated Carbon Observation System (ICOS)  
149 protocol (Laurent, 2020), using NOAA standard calibration cylinders. Further details of the  
150 calibration process are provided in Supplementary Section S1.

Deleted: 2016

151

### 152 2.2.2 Trace gas measurements

153 In addition to the measurements of CO<sub>2</sub> and CH<sub>4</sub>, we also utilised the measurements of trace  
154 gases to establish the species interrelationships and to identify drivers of GHG sources. We  
155 used a compact air-quality measurement instrument with gas sensors (CUPI-G) to continuously  
156 measure air pollutants, including fine particulate matter (PM<sub>2.5</sub>), nitric oxide (NO), nitrogen  
157 dioxide (NO<sub>2</sub>), and carbon monoxide (CO). The sensors used in CUPI-G are a palm-sized  
158 optical PM<sub>2.5</sub> sensor developed by Panasonic, a CO-B4 Carbon Monoxide Sensor, and an NO-  
159 B4 Nitric Oxide Sensor, developed by Alphasense. The sensitivity of the PM<sub>2.5</sub> and CO sensors  
160 was evaluated in Nagasaki, Japan, through intercomparisons with reference-grade instruments  
161 employing a beta attenuation monitor (BAM) for PM<sub>2.5</sub> and non-dispersive infrared (NDIR)  
162 spectroscopy for CO measurements (Figure S1). The estimated unit-to-unit variability was 29%  
163 for PM<sub>2.5</sub> sensors and 21% for CO sensors. Further details on the sensor specifications and the  
164 calibration methodology are described in Mangaraj et al. (2025).

Deleted: the

Deleted: the

Deleted: , respectively.

Deleted: (courtesy of Prof. Tomoki Nakayama),

Deleted: .

165

### 166 2.2.3 Local meteorology measurements

167 A Vaisala Ceilometer lidar CL61 provides real-time measurements of cloud base height (CBH)  
168 for up to five layers, along with depolarisation measurements, under all weather conditions. To

175 determine the Planetary boundary layer height (PBLH) from the range-corrected attenuated  
176 backscatter data, the gradient method (Summa et al., 2013) and the Wavelet Covariance  
177 Transform (WCT) method (Baars et al., 2008) were employed. Further details on PBLH  
178 calculations can be found in Rathore et al., (2025). An automatic weather station (AWS) by  
179 Geonica, installed on the I-Tech building rooftop, collected meteorological data at 5-minute  
180 intervals. The data, including ambient temperature, relative humidity (RH), atmospheric  
181 pressure, wind speed and direction, precipitation, and incoming solar radiation, were retrieved  
182 using Datagraph-W4K 2.1.3.0 software and exported in CSV format. All sensors were  
183 meticulously calibrated and regularly cleaned to ensure accuracy and reliability.

184

## 185 **2.3 Auxiliary data**

### 186 **2.3.1 ObsPack Data**

187 To compare the seasonality of atmospheric CO<sub>2</sub> of Sonipat with other non-Indian sites in the  
188 same latitudinal band, we used selected sites from the  
189 obspack\_co2\_1\_GLOBALVIEWplus\_v10.1\_2024-11-13 (Schuldt et al., 2024). The data was  
190 averaged for five years from 2018 to 2022 for all stations except Boulder Atmospheric  
191 Observatory, Colorado, (2011-2016), to compare the seasonality over different locations across  
192 the globe.

193

### 194 **2.3.2 Satellite CO<sub>2</sub> retrievals**

195 Along with the ground-based in situ CO<sub>2</sub> measurements at the Sonipat monitoring station, we  
196 also used column average dry air CO<sub>2</sub> mole fraction (XCO<sub>2</sub>) retrievals from the Orbiting  
197 Carbon Observatory-2 and 3 satellites (OCO-2 and OCO-3) (Crisp et al., 2017; Eldering et al.,  
198 2017). We used the bias-corrected OCO-2 v11.1r data product for the period from February  
199 2023 to December 2024. The OCO-3 satellite provides XCO<sub>2</sub> data at a repeat cycle of 16 days  
200 with a spatial resolution of 1.60 km × 2.25 km (nadir observation), which increases the swath  
201 area from ~3.0 km<sup>2</sup> to ~3.5 km<sup>2</sup>. We used the bias-corrected OCO-3 v10.4r data product  
202 (Eldering et al., 2019; Srivastava et al., 2020) for the period from February 2023 to December  
203 2024.

204

### 205 **2.3.3 FluxSat GPP**

206 To study the Gross Primary Production (GPP) fluxes over Sonipat, we used FluxSat v2.2 native  
207 GPP product computed at the spatio-temporal resolution of the MCD43C data set (daily at  
208 0.05° spatial resolution (Schaaf et al., 2002; Wang et al., 2018). FluxSat v2.2 has been derived

209 from the MODerate resolution Imaging Spectroradiometer (MODIS) instruments on the NASA  
210 Terra and Aqua satellites using the collection 6.1 MCD43C Bidirectional Reflectance  
211 Distribution Function (BRDF)-Adjusted Reflectances (NBAR) (Joiner et al., 2018; Joiner and  
212 Yoshida, 2020; Schaaf and Wang, 2021). FluxSat v2.2 is “calibrated” using a set of the  
213 FLUXNET 2015 and OneFlux tier 1 (publicly released) eddy covariance (EC) data and has  
214 been compared with independent data (i.e., not used in the calibration) as validation. We used  
215 Global Gross Primary Production (GPP) estimates for 2023 in this study.

216

### 217 **2.3.4 Ecosystem-proxy variables**

218 We used two key ecosystem proxy variables to examine the carbon cycle dynamics at the  
219 Sonipat station and in the IGP region. The Normalised Difference Vegetation Index (NDVI)  
220 version 5 data from the Advanced Very High Resolution Radiometer (AVHRR) was used here  
221 (Vermote and NOAA CDR Program, 2018). The NDVI CDR summarises surface vegetation  
222 coverage activity based on measurements in the red and near-infrared spectral bands at daily  
223 intervals and at a spatial resolution of  $0.05^\circ \times 0.05^\circ$ .

224 To understand the photosynthetic capacity of the regional ecosystem to assimilate  
225 atmospheric CO<sub>2</sub>, we used Solar-Induced Chlorophyll Fluorescence (SIF) retrievals from the  
226 OCO-2 satellite (Frankenberg et al., 2014). The OCO-2 provides SIF data at a temporal  
227 resolution of 16 days and a spatial resolution of  $1.35 \text{ km} \times 2.25 \text{ km}$ . The estimation of SIF  
228 relies on evaluating the in-filling of solar Fraunhofer lines at 757 nm and 770.1 nm surrounding  
229 the O<sub>2</sub> A-band (Frankenberg et al., 2014; Sun et al., 2018). We used bias-corrected SIF data  
230 from OCO-2 v11r and v11.2r SIF data products.

231

## 232 **2.4 Models**

### 233 **2.4.1 JAMSTEC's MIROC version 4 atmospheric chemistry-transport model (MIROC4- 234 ACTM)**

235 We used the Model for Interdisciplinary Research on Climate version 4 (MIROC4),  
236 atmospheric general circulation model (AGCM)-based chemistry-transport model (MIROC4-  
237 ACTM; Patra et al., 2018), to simulate CO<sub>2</sub> mole fraction for this study. Simulations were  
238 performed at a horizontal resolution of T42 spectral truncations ( $\sim 2.8^\circ$  latitude–longitude grid)  
239 with 67 vertical hybrid-pressure layers between the Earth's surface and 0.0128 hPa ( $\sim 80 \text{ km}$ ).  
240 CO<sub>2</sub> tracers were simulated corresponding to fossil fuel combustion (FFCO<sub>2</sub>), land biosphere  
241 fluxes (LBCO<sub>2</sub>), fire emissions (CO<sub>2fire</sub>), and ocean exchanges (CO<sub>2ocean</sub>) from different prior  
242 (bottom-up) emissions sets (Chandra et al., 2022). FFCO<sub>2</sub> was simulated using the gridded

243 fossil fuel emission dataset (GridFED; Jones et al., 2021). LBCO<sub>2</sub> tracers were simulated using  
244 two sets of terrestrial biosphere fluxes from the Carnegie-Ames-Stanford Approach (CASA)  
245 biogeochemical model (Randerson et al., 1997) and Vegetation Integrative Simulator for Trace  
246 Gases (VISIT) (Ito, 2019).

247

#### 248 **2.4.2 CarbonTracker (CT) inverse model**

249 To understand the temporal pattern of atmospheric CO<sub>2</sub> mole fraction over the study station  
250 and the IGP region, we used simulated CO<sub>2</sub> mole fraction from an inverse modelling  
251 framework CarbonTracker (CT) (Peters et al., 2005). Here, we used the CarbonTracker 2022  
252 release (CT2022), which incorporated two-way nesting of the offline atmospheric tracer  
253 transport model TM5, supporting coarse-resolution global data and high-resolution regional  
254 data (Krol et al., 2004). The TM5 model in CT2022 was driven with meteorology from the  
255 ERA-interim reanalysis provided by the European Center for Medium-Range Weather  
256 Forecasts (ECMWF). The CT2022 inverse model simulated atmospheric CO<sub>2</sub> mole fraction by  
257 correcting the prior specifications of CO<sub>2</sub> sources and sinks in the model by assimilating global  
258 in situ observations. In this study, we used the CT2022-simulated CO<sub>2</sub> mole fraction from  
259 February 2023 to October 2023.

260

#### 261 **2.4.3 GEOS-Chem inverse model**

262 To study the seasonality of the fluxes over Sonipat, we used a four-dimensional variational  
263 (4D-Var) assimilation system with the GEOS-Chem global chemical transport model  
264 (CTM; Philip et al., 2019, 2022). The GEOS-Chem 4D-Var system was constrained with XCO<sub>2</sub>  
265 retrievals from the OCO-2 satellite (Philip et al., 2022), following the protocol of the OCO-2  
266 v10 Multi-model Intercomparison Project (MIP) (Byrne et al., 2017; Liu et al., 2014). The Net  
267 Ecosystem Exchange (NEE) fluxes for 2023 at a spatial resolution of 1° × 1°, constrained with  
268 the OCO-2 Land Nadir and Land Glint observational modes are used here.

269

#### 270 **2.4.4 Mi CASA terrestrial biospheric model**

271 We also used simulated CO<sub>2</sub> fluxes from a terrestrial biospheric model (TBM) in this study.  
272 The Más informada Carnegie-Ames-Stanford-Approach (Mi CASA) model (Weir, 2024), a  
273 comprehensive update to the CASA – Global Fire Emissions Database, version 3 (CASA-  
274 GFED3) product, was utilised here (Chen et al., 2023; Potter et al., 1993). Mi CASA provides  
275 daily global data at 0.1° resolution from January 2001 to December 2023. This includes carbon  
276 flux variables from sources such as net primary production (NPP), heterotrophic respiration

277 (Rh), wildfire emissions (FIRE), and fuel wood burning emissions (FUEL). The model is  
 278 driven with meteorological data from NASA's Modern-Era Retrospective analysis for Research  
 279 and Application, Version 2 (MERRA-2).

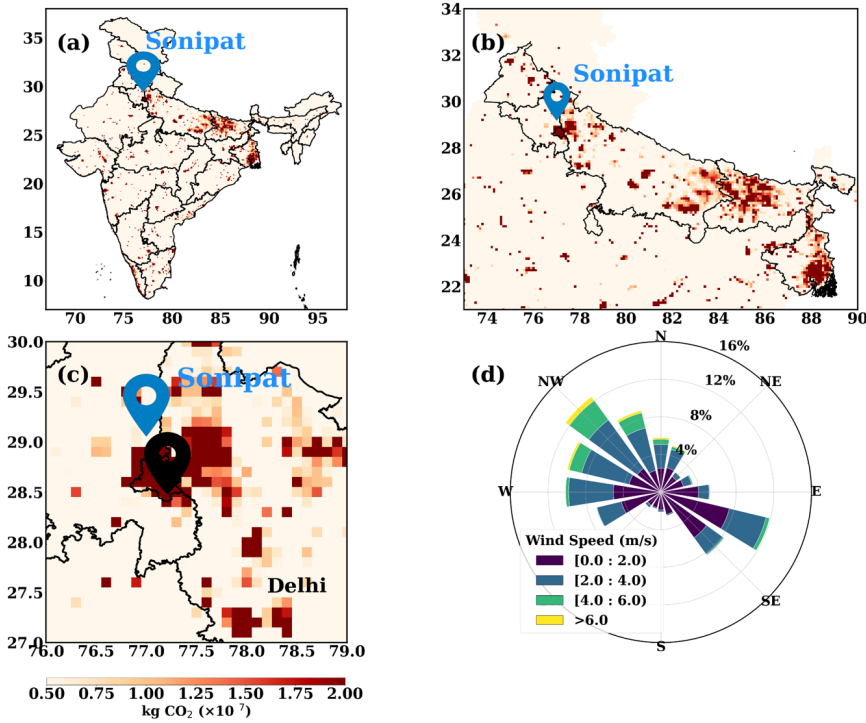

280  
 281 **Figure 1:** Anthropogenic CO<sub>2</sub> emissions over (a) India (b) IGP and (c) Sonipat/Delhi derived  
 282 from the EDGAR emission inventory for 2021. (d) Annually averaged wind patterns over  
 283 Sonipat for February 2023 – January 2024.

284  
 285

### 286 3. Results and discussions

#### 287 3.1 CO<sub>2</sub> measurements at Sonipat station

288 Figures 1(a-c) illustrate the annual mean anthropogenic CO<sub>2</sub> emissions over India, IGP and  
 289 Delhi/Sonipat for 2021 based on the EDGAR emission inventory, a major hotspot of  
 290 anthropogenic CO<sub>2</sub> emissions. The dominant wind direction over Sonipat was from the

291 northwest during the study period, highlighting influence from upwind sources of pollution and  
 292 greenhouse gases (Figure 1d). Seasonal changes in meteorological parameters (air temperature,  
 293 relative humidity, rainfall and wind; Figures S2 and S3) were also analysed alongside CO<sub>2</sub> to  
 294 better understand the role of meteorology in Sonipat. In this study, we focus on seasonal and  
 295 diurnal CO<sub>2</sub> variability and compare these patterns with those at other stations in India and in  
 296 the same latitudinal band across the globe to uncover the unique aspects of CO<sub>2</sub> dynamics over  
 297 Sonipat and the IGP.

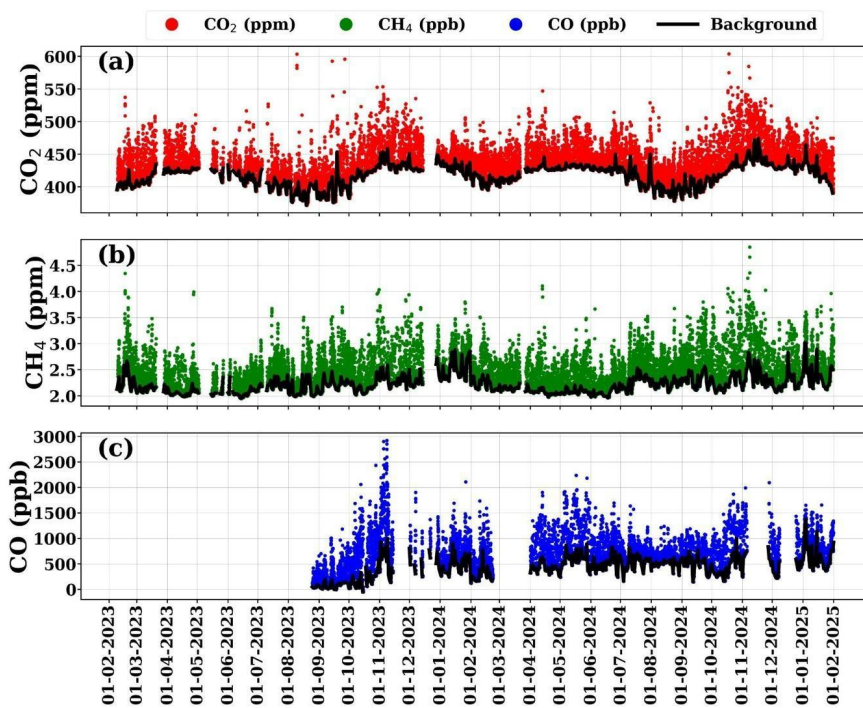

298 **Figure 2:** (a) Hourly averaged time series of atmospheric (a) CO<sub>2</sub>, (b) CH<sub>4</sub>, and (c) CO mole  
 299 fraction for the study period (February 2023 to January 2025) over Sonipat. The thick black  
 300 line represents the background mole fraction estimated using the ADVS method. CO<sub>2</sub> and CH<sub>4</sub>  
 301 measurements were made using a Picarro GHG analyser, and CO measurements were made  
 302 using CUPI-G sensor.

303  
 304  
 305 Figure 2 presents the hourly averaged time series of atmospheric (a) CO<sub>2</sub>, (b) CH<sub>4</sub>, and  
 306 (c) CO mole fractions at Sonipat during the study period (February 2023 to January 2025).

307 Hourly CO<sub>2</sub> mole fractions range from ~380 ppm to ~550 ppm, indicating strong monthly  
308 variations in CO<sub>2</sub> mole fractions at the monitoring station. The lowest CO<sub>2</sub> mole fractions were  
309 observed from July to August, which coincided with weak CO and strong CH<sub>4</sub> values. The  
310 highest mole fractions of CO<sub>2</sub> were observed from October to November, coinciding with the  
311 highest mole fractions of CO and CH<sub>4</sub>. We found an annual mean CO<sub>2</sub> mole fraction of  
312 440.8±19.7 ppm for 2024 and compared it with those from other monitoring stations across  
313 India (Table S1). Interestingly, despite differences in site characteristics, the annual mean CO<sub>2</sub>  
314 levels at rural stations like Gadanki and urban stations like Ahmedabad are comparable,  
315 whereas Sonipat shows distinctly higher values.

## 316 **3.2 Seasonal variability**

### 317 **3.2.1 Seasonality of in situ observations**

318 Figure 3 shows the monthly mean atmospheric CO<sub>2</sub> mole fractions during the study period. A  
319 shaded background has been used to distinguish the seasonal regimes used in this study. The  
320 monthly mean CO<sub>2</sub> mole fraction shows a maximum in November (post-monsoon season) and  
321 a minimum in August (monsoon season) in both years. The observed seasonal mean of CO<sub>2</sub>  
322 during different seasons were 440.8±19.7 ppm (pre-monsoon), 422.6±23.3 ppm (monsoon),  
323 456.4±30.8 ppm (post-monsoon), and 440.5±19.7 ppm (winter).

324 The seasonal change in CO<sub>2</sub> mole fractions over the monitoring station is governed by  
325 the strength of emission sources, photosynthetic activity (biospheric fluxes), local meteorology  
326 and atmospheric transport. The planetary boundary layer height (PBLH), which is determined  
327 by local meteorology, strongly influences CO<sub>2</sub> mole fractions. PBL is the lowest layer within  
328 the troposphere, where temperature and wind speed variations are integral in modulating its  
329 height. During pre-monsoon, deep convection due to the well-developed PBLH from the  
330 surface to the upper troposphere results in lower mole fractions of CO<sub>2</sub>, while the weakly  
331 developed PBLH in winter leads to higher CO<sub>2</sub> (Baker et al., 2012; Kar et al., 2004; Park et al.,  
332 2009; Patra et al., 2011; Randel and Park, 2006).

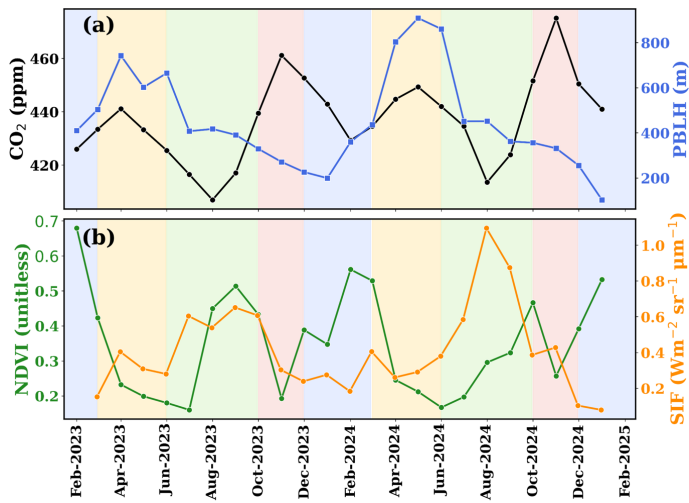

333

334 **Figure 3:** (a) Monthly variations of atmospheric CO<sub>2</sub> mole fraction (black) and PBLH (blue)  
 335 and (b) NDVI (green) and SIF (orange) over the Sonipat monitoring station during the study  
 336 period. The shaded background represents different seasons; yellow (pre-monsoon), green  
 337 (monsoon), red (post-monsoon) and blue (winter).

338 The seasonal change in CO<sub>2</sub> was examined using two different vegetation indices  
 339 (normalised difference vegetation index, NDVI and solar-induced fluorescence, SIF) to assess  
 340 the role of the biosphere in CO<sub>2</sub> mole fractions over Sonipat. Both NDVI and SIF have been  
 341 widely used as indicators of vegetation cover and photosynthetic activity (Aburas et al., 2015;  
 342 Nath, 2014). Our analysis shows a strong inverse relationship between CO<sub>2</sub> levels and NDVI,  
 343 as illustrated in Figure 3b. A noticeable decrease in atmospheric CO<sub>2</sub> mole fraction is observed  
 344 at the onset of the monsoon (June), with increased vegetative activity continuing until  
 345 September. Increased vegetation cover increases photosynthetic carbon uptake by the  
 346 biosphere. However, as vegetation activity decreases from the post-monsoon to winter and pre-  
 347 monsoon seasons, photosynthetic carbon uptake decreases, leading to a rise in atmospheric  
 348 CO<sub>2</sub>. Spearman's rank correlation analysis showed a weak and statistically insignificant  
 349 relationship between CO<sub>2</sub> and NDVI ( $\rho = -0.09$ ,  $p = 0.74$ ). In contrast, CO<sub>2</sub> exhibited a  
 350 moderate negative correlation with SIF ( $\rho = -0.42$ ,  $p = 0.07$ ). The negative correlation with  
 351 SIF is consistent with enhanced biospheric uptake during periods of increased photosynthetic  
 352 activity. Similar studies (Metya et al., 2021; Sreenivas et al., 2016; Tiwari et al., 2014), over  
 353 India exhibited a strong dependence of CO<sub>2</sub> seasonality on local vegetative carbon uptake.

354 A sharp decrease in the seasonal mean (~18 ppm) was noted from pre-monsoon to  
355 monsoon, attributed to enhanced photosynthetic activity around the measurement site, driven  
356 by abundant soil moisture. A further decrease in CO<sub>2</sub> mole fraction is also observed as the  
357 monsoon progresses, with minimum CO<sub>2</sub> mole fractions observed in August. The decreases in  
358 temperature (due to cloudy, overcast conditions prevailing during these months) reduce leaf  
359 and soil respiration, thereby enhancing carbon uptake (Jing et al., 2010; Patil et al., 2014).  
360 Further, an increase in CO<sub>2</sub> mole fraction (~34 ppm) is observed during post-monsoon,  
361 reflecting higher ecosystem respiration (Sharma et al., 2014) and enhanced soil microbial  
362 activity (Fan & Forkel, 2025; Munksgaard et al., 2022), particularly from nocturnal respiration  
363 prior to crop harvest. The gradual decline in NDVI during this period indicates reduced CO<sub>2</sub>  
364 uptake by vegetation. This season coincided with crop-burning episodes in northern India,  
365 which significantly increased CO<sub>2</sub> mole fractions. A sharp decrease (~16 ppm) in the seasonal  
366 mean during winter is evident compared to the post-monsoon. The shallow PBLH and winds  
367 from western IGP that transport crop-burning residue contribute to the enhanced mole fraction  
368 during winter. Table S2 compares the seasonal amplitude and the peak and drawdown months  
369 at the measurement site with those in similar studies across India. Sonipat exhibits higher  
370 seasonal amplitudes than other sites. However, a similar pattern in CO<sub>2</sub> peak and drawdown  
371 months is evident in other monitoring stations.

### 372 3.2.2 Seasonal constraints from model and satellites

373 Figure 4(a) shows the comparison of ground-based mole fraction of CO<sub>2</sub> with CarbonTracker  
374 inverse model (CT2022) simulated mole fraction (see different y-axis). The model outputs  
375 beyond October 2023 were not publicly available. In general, the CT2022 model-simulated  
376 mole fractions are much lower than the observed mole fractions at the Sonipat station. The  
377 discrepancy is mainly due to the model's coarser resolution. Nevertheless, the model-simulated  
378 seasonal pattern of CO<sub>2</sub> mole fraction is broadly in agreement with observations (Figure 4).  
379 The CT2022 model simulates a minimum mole fraction of 416 ppm in September, whereas in  
380 situ measurements show a minimum of 407 ppm in August. The CT2022 model exhibits higher  
381 mole fractions during the pre-monsoon season, consistent with in situ data. Note that most  
382 global and regional chemical transport models were unable to reproduce the large seasonal  
383 amplitude of surface-based measured atmospheric CO<sub>2</sub> mole fractions at any of the monitoring  
384 stations in India with different ecosystems (Lin et al., 2018; Philip et al., 2022).

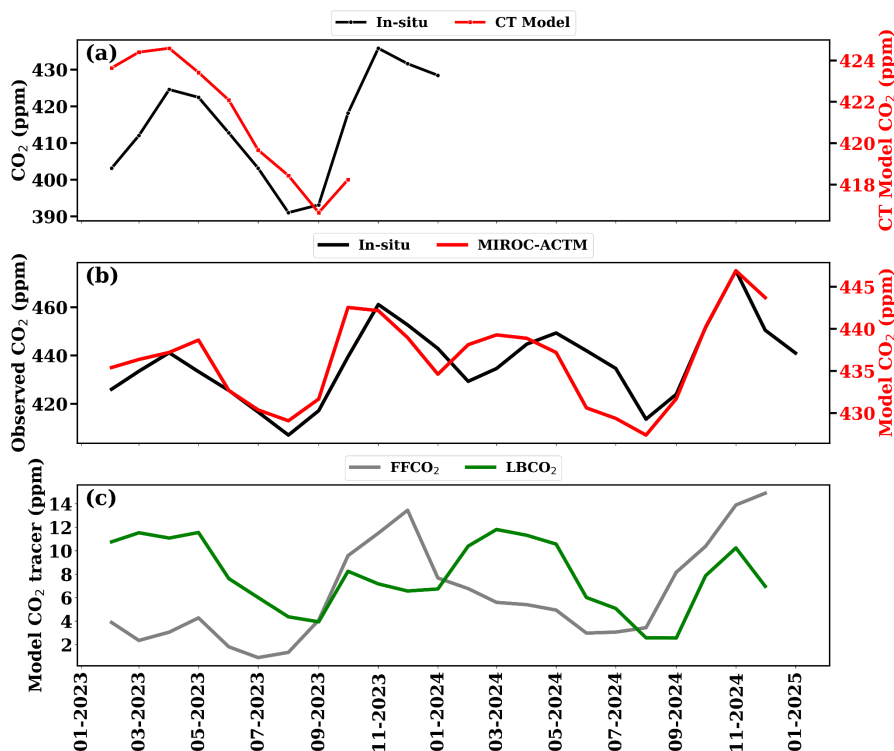

385  
 386 **Figure 4:** (a) Monthly mean background CO<sub>2</sub> mole fraction over Sonipat (estimated using the  
 387 ADVS method) compared to CarbonTracker (CT2022) model-simulated values at daytime  
 388 (13:00 – 16:00). Note that the left y-axis represents surface mole fraction from in situ  
 389 measurements, and the right y-axis represents CT2022-simulated mole fraction. (b) comparison  
 390 of simulated mole fraction of atmospheric CO<sub>2</sub> from MIROC-ACTM with in situ  
 391 measurements at Sonipat and (c) monthly averaged time series of different tracers from the  
 392 MIROC-ACTM.

393  
 394 Figure 4(b) shows the comparison of atmospheric CO<sub>2</sub> mole fractions over Sonipat with  
 395 the simulated mole fraction of CO<sub>2</sub> from the MIROC4-ACTM model. Similar to CT2022,  
 396 MIROC captures the seasonal pattern of CO<sub>2</sub>, but fails to capture the actual seasonal amplitude  
 397 over Sonipat. Figure 4(c) presents the monthly averaged time series of model-simulated CO<sub>2</sub>  
 398 tracers. The fossil fuel tracer (FFCO<sub>2</sub>) exhibits a peak in the post-monsoon period, followed by  
 399 a gradual decrease through the end of winter. The shallow PBLH during this time traps  
 400 vehicular emissions from NH-44 and industrial sources upwind of the monitoring station,

401 resulting in higher FFCO<sub>2</sub>. With the development of the PBLH in the pre-monsoon, FFCO<sub>2</sub>  
 402 shows a gradual decrease, and rainfall during the monsoon results in minimum values during  
 403 this time. The biospheric tracer (LBCO<sub>2</sub>) shows a peak during the pre-monsoon, driven by dry  
 404 soil conditions and a lack of vegetation and a drawdown during the monsoon. A sharp increase  
 405 in LBCO<sub>2</sub> is observed during the post-monsoon season, coinciding with the harvest period at  
 406 the monitoring station. Being surrounded by agricultural land, Sonipat is prone to emissions  
 407 from crop residue burning around and upwind of the monitoring station. Both models  
 408 underestimate these enhancements from regional sources.

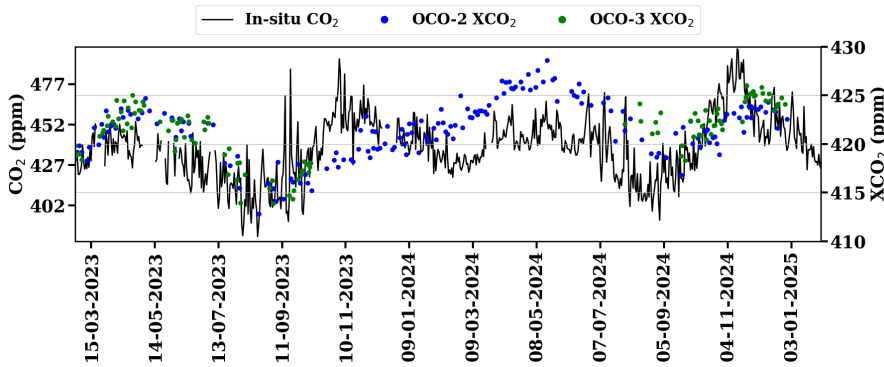

409 **Figure 5:** Daily variations of atmospheric CO<sub>2</sub> mole fraction from in situ measurements over  
 410 Sonipat (left y-axis) with column average CO<sub>2</sub> mole fraction (XCO<sub>2</sub>) from the OCO-2 (ppm)  
 411 and OCO-3 (ppm) satellite instruments (right y-axis).  
 412  
 413

414 Figure 5 compares XCO<sub>2</sub> from OCO-2 and OCO-3 satellites with ground-based CO<sub>2</sub>  
 415 measurements at Sonipat during the study period. XCO<sub>2</sub> reveals a similar seasonal pattern with  
 416 high mole fraction during the pre-monsoon season, followed by a drawdown in CO<sub>2</sub> mole  
 417 fraction during the monsoon season and a further gradual increase in CO<sub>2</sub> during the post-  
 418 monsoon and winter. Although the satellite column data captures the monthly variability  
 419 reasonably well, it fails to capture the sharp increase in mole fraction during the post-monsoon.  
 420 This post-monsoon enhancement from crop residue burning at the monitoring station, along  
 421 with additional transport from Punjab, highlights the limitations of high-resolution satellite data  
 422 in capturing local enhancements.

Deleted: regional scale

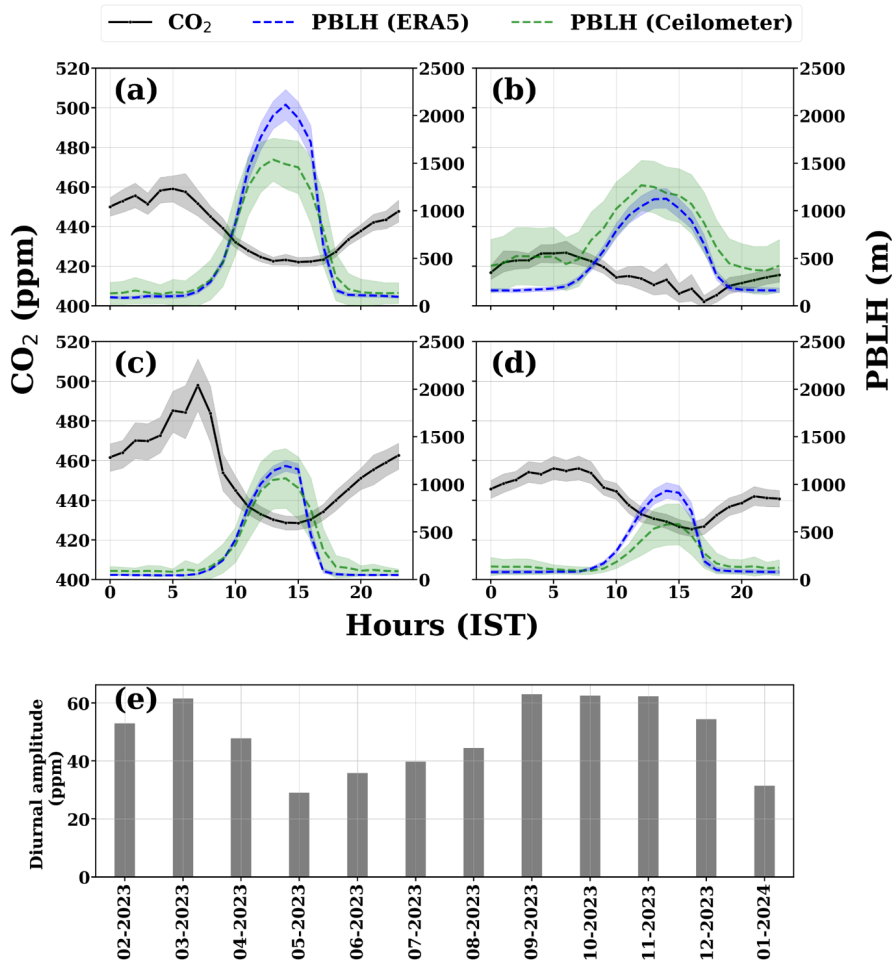

424  
 425 **Figure 6:** (a-d) Seasonally-averaged diurnal variation of atmospheric CO<sub>2</sub> over the Sonipat  
 426 station during the pre-monsoon (MAM), monsoon (JJAS), post-monsoon (ON) and winter  
 427 (DJF) seasons with planetary boundary layer heights (blue denotes PBLH from ERA5 and  
 428 green denotes PBLH derived from Ceilometer), (e) monthly variation of the diurnal amplitude  
 429 of CO<sub>2</sub> from February 2023 to January 2024.

430  
 431 **3.3 Diurnal variability**

432 Figure 6 (a-d) presents the averaged diurnal variation of atmospheric CO<sub>2</sub> mole  
 433 fractions along with PBLH from ERA5 and Ceilometer at Sonipat during four seasons for the

434 first year of the study (February 2023 – January 2024). Figure S5 presents the diurnal variation  
435 for the second year of the study. The diurnal cycle has been analysed separately for each year,  
436 combining available PBLH data. All seasons exhibit a similar diurnal pattern, with maximum  
437 CO<sub>2</sub> mole fractions in the early morning hours (05:00 - 08:00 am) and minimum mole fractions  
438 in the late afternoon hours (2:00 - 3:00 pm). The observed diurnal cycle of CO<sub>2</sub> is closely  
439 associated with the development of PBLH during the day (Figure 6). The peak in CO<sub>2</sub> mole  
440 fraction during the morning hours can be attributed to the fumigation effect, and a well-mixed  
441 PBL dilutes CO<sub>2</sub> mole fractions during the afternoon hours.

Deleted: S4

442 Photosynthetic activity is another key driver of diurnal variability at Sonipat, a  
443 characteristic observed in rural areas with vegetative cover (Imasu & Tanabe, 2018). Strong  
444 vegetative uptake of CO<sub>2</sub> during the monsoon results in minimum daytime CO<sub>2</sub> mole fractions,  
445 and the lack of vegetation during post-monsoon contributes to maximum daytime CO<sub>2</sub> mole  
446 fractions during this season. The diurnal variation of GHGs reported by several studies  
447 (Nishanth et al., 2014; Patil et al., 2014; Sharma et al., 2014) from different parts of the country  
448 shows a similar trend. The same was observed for 2024 as well (Figure S5). The diurnal  
449 variability of CO<sub>2</sub> over Sonipat is driven by biospheric activity and local meteorology.

Deleted: S4

450 Figure 6(e) shows the monthly average variation in diurnal amplitude (difference between the  
451 maximum and minimum mole fraction of CO<sub>2</sub> in the diurnal cycle) during the first year. The  
452 lowest diurnal amplitude of about 29 ppm is observed in May, while the highest amplitude at  
453 about 63 ppm is observed in September/October. We found that the post-monsoon season  
454 exhibited the highest diurnal variability (~60 ppm), followed by the pre-monsoon (~35 ppm),  
455 winter (~30 ppm), and monsoon (~20 ppm) seasons.

456

### 457 **3.4 Drivers of CO<sub>2</sub> seasonality**

458 The contribution of biospheric fluxes in driving the CO<sub>2</sub> mole fraction over Sonipat (for  
459 2023) was analysed in Figure 7. Figure 7(a) shows the simulated data from the Mi CASA  
460 biosphere model along with the monthly averaged mole fractions of CO<sub>2</sub> and daytime CO<sub>2</sub>  
461 (06:00 – 18:00). Figure 7(b) presents the simulated NEE from GEOS-Chem and GPP from  
462 FluxSat, along with the monthly averaged mole fractions of daily-mean and nighttime CO<sub>2</sub>  
463 (18:00 – 06:00). Positive NEE values indicate a net exchange of CO<sub>2</sub> from the biosphere to the  
464 atmosphere. On the other hand, a negative NEE value (when NPP exceeds Rh) suggests the  
465 uptake of CO<sub>2</sub> from the atmosphere to the biosphere.

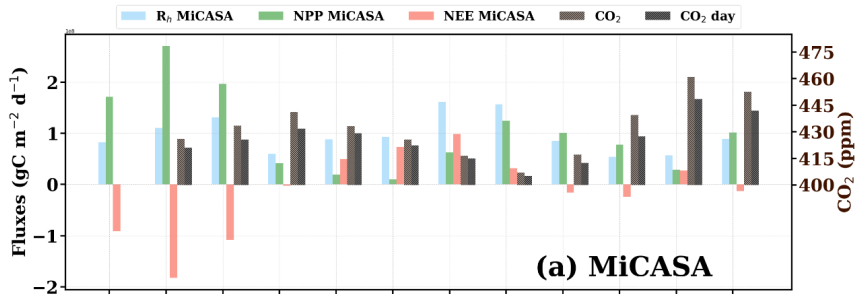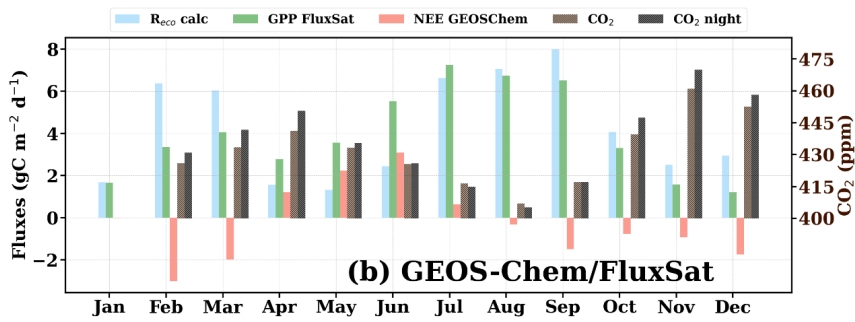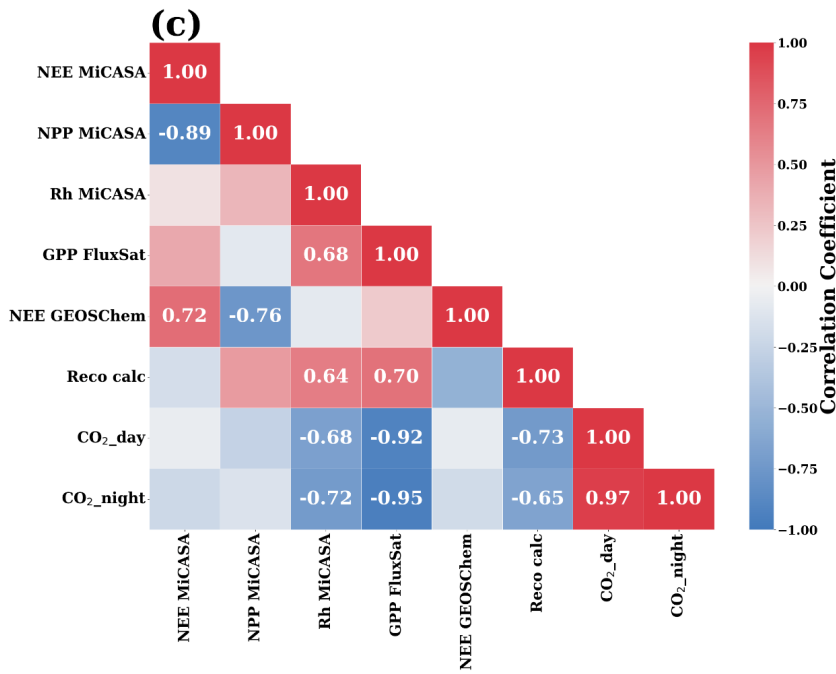

469 **Figure 7:** Monthly variation of atmospheric CO<sub>2</sub> mole fraction (for 2023) over the Sonipat  
470 monitoring station compared against (a) biospheric fluxes from the MiCASA terrestrial  
471 biospheric model and (b) GEOS-Chem model and FluxSat GPP data. (a - b) The CO<sub>2</sub> mole  
472 fraction are daytime-mean (06:00 - 18:00 LT) and night time-mean (18:00 - 06:00 LT). The  
473 correlation heatmap of all the variables. The annual growth rate of CO<sub>2</sub> has been subtracted  
474 from the CO<sub>2</sub> mole fraction using background data from the Mauna Lou observatory. The  
475 variable “Reco calc” was calculated as the difference between NEE (GEOS-Chem) and GPP  
476 (FluxSat). The Pearson correlation coefficients with a p value less than 0.05 have been  
477 displayed in the correlation plot.

478

479 The NEE flux shows a strong positive in June, followed by a gradual decrease through  
480 October (monsoon). During this time, Reco, Rh and GPP exhibit strong enhancements. These  
481 enhancements are accompanied by a drawdown of CO<sub>2</sub> during this time. The driving factor  
482 behind this CO<sub>2</sub> drawdown during monsoon is the enhanced ecosystem productivity during this  
483 time. Strong inverse correlations of GPP, Rh, and Reco with CO<sub>2</sub> suggested that the biosphere  
484 acts as a net sink of CO<sub>2</sub> (Figure 8c).

485 Interestingly, post-monsoon and winter months exhibit weak or negative NEE. This is  
486 because Rh values are low during these seasons due to drier soil conditions and lower soil  
487 moisture. It is also notable that GPP is very low during these months, which is associated with  
488 a high CO<sub>2</sub> mole fraction. Significant contributions of air-mass transport from upwind regions  
489 and boundary-layer dynamics, along with the lack of vegetation during this time, contribute to  
490 the buildup of CO<sub>2</sub> mole fraction.

491

492

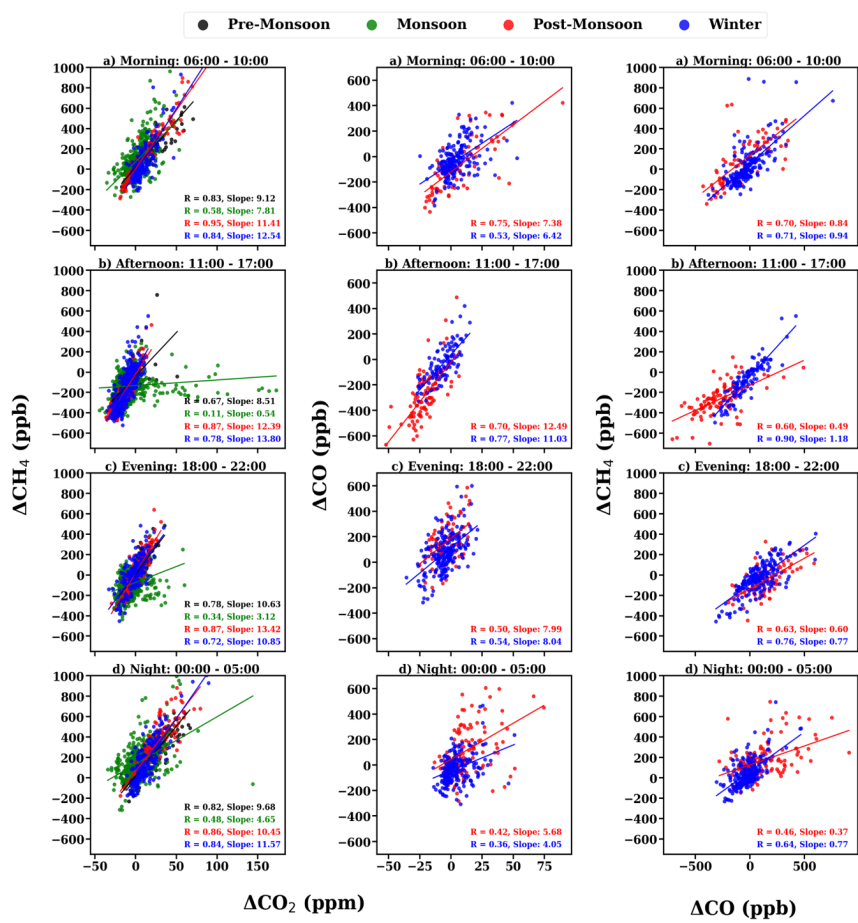

493  
 494 **Figure 8:** Tracer-tracer relations of  $\Delta\text{CO}_2/\Delta\text{CH}_4$  (left panel),  $\Delta\text{CO}_2/\Delta\text{CO}$  (middle panel) and  
 495  $\Delta\text{CH}_4/\Delta\text{CO}$  (right panel) during a) Morning (0600–1000 IST), b) afternoon (1100–1700 IST),  
 496 c) evening (1800–2200 IST) and d) night (0000–0500 IST).

497  
 498 **3.5 Emission source detection using tracer-tracer relationships**

499 The ratios (tracer-tracer) of GHGs have been widely used in previous studies to estimate  
 500 different emission source contributions to atmospheric GHGs (Chandra et al., 2016, 2019; Lin  
 501 et al., 2015; Lopez, 2012; Paris et al., 2008; Sreenivas et al., 2016, 2022). We followed a similar  
 502 tracer-tracer correlation analysis to assess synoptic variation in  $\text{CO}_2$  across different diurnal  
 503 time windows and understand the emission sources contributing to  $\text{CO}_2$  mole fractions over

504 Sonipat (Figure 8). The measurements have been divided into four-time windows: (a) morning  
505 hours (06:00 - 10:00; the PBLH starts to develop after sunrise; local traffic is high), (b)  
506 afternoon hours (11:00 - 17:00; the PBLH is well-developed; relatively minimum local traffic,  
507 (c) evening hours (18:00 - 22:00; rush hour traffic and high household emissions), and (d) night  
508 hours (00:00 - 00:05; relatively less anthropogenic emission sources). Excess mole fractions  
509 were used in the correlation analysis to remove the influence of background mole fractions on  
510 the correlation ratios (Worthy et al., 2009). The correlation between the different gases (CO<sub>2</sub>,  
511 CH<sub>4</sub>, and CO) has been studied using the robust linear fit regression method.

512

513 Figure 8 (left panel) presents the correlation of excess mole fraction of CH<sub>4</sub> and CO<sub>2</sub>  
514 during the four seasons. The CH<sub>4</sub>/CO<sub>2</sub> correlation reveals a strong correlation ( $r > 0.6$ ) for all  
515 seasons except monsoon during all time windows, which suggests a similar source mechanism  
516 or a controlling emission process for both gases at the measurement site. Around the monitoring  
517 station, vehicular emissions from the nearby highway and natural gas combustion emissions  
518 are possible sources. Also, a positive correlation suggests that anthropogenic emissions  
519 dominate the carbon cycle in Sonipat (Fang et al., 2015). The regression slope shows strong  
520 diurnal variation throughout all seasons. Recent studies across India have reported similar  
521 results, with higher regression slopes during the post-monsoon and winter seasons than during  
522 the pre-monsoon and monsoon seasons (Lin et al., 2015; Sreenivas et al., 2016, 2022).

523

524 Figure 8 (middle panel) presents the correlation of excess mole fractions of CO and  
525 CO<sub>2</sub> during post-monsoon and winter. The CO/CO<sub>2</sub> ratio over Sonipat (4 – 12.5 ppb ppm<sup>-1</sup>) is  
526 lower than that for fresh plumes from wildfire (Andreae and Merlet, 2001; Mauzerall et al.,  
527 1998) and much lower than that from biomass burning events alone (Matsueda et al., 1999).  
528 Lin et al. (2015) reported CO/CO<sub>2</sub> ratios of 13 ppb ppm<sup>-1</sup> over Southeast Asian outflow from  
529 February to April 2001. This value was found to be influenced by fossil fuel emissions (Russo  
530 et al., 2003), crop residue burning, and biofuel burning rather than solely by biomass/biofuel  
531 burning. The CO/CO<sub>2</sub> ratios over Sonipat during the post-monsoon and winter closely match  
532 those of Lin et al. (2015), suggesting that the high CO<sub>2</sub> mole fractions during this time are an  
533 interplay of different sources like crop residue burning (long-range transport) and other fossil-  
534 fuel emissions (vehicular and industrial) around the monitoring station.

535

536 Figure 8 (right panel) presents the correlation of excess mole fractions of CH<sub>4</sub> and CO during  
537 post-monsoon and winter. The CH<sub>4</sub>/CO ratios range from 0.3 to 1.2 at Sonipat, indicative of

538 anthropogenic emission sources (Bakwin et al., 1995; Harriss et al., 1994; Lai et al., 2010; Lin  
 539 et al., 2015; Niwa et al., 2012; Sawa et al., 2004; Wada et al., 2011; Xiao et al., 2004). In  
 540 contrast, ratios influenced solely by biomass and biofuel burning are much lower, ranging from  
 541 0.07 to 0.3 (Andreae and Merlet, 2001; Mauzerall et al., 1998; Mühle et al., 2002).

542 These lower ratios highlight the significant difference when compared to the values  
 543 recorded in Sonipat. Moreover, very high CH<sub>4</sub> emissions from livestock can elevate the  
 544 generally low CH<sub>4</sub>/CO ratios associated with biomass burning. This indicates substantial  
 545 contributions from various CH<sub>4</sub> sources apart from biofuel burning.

546

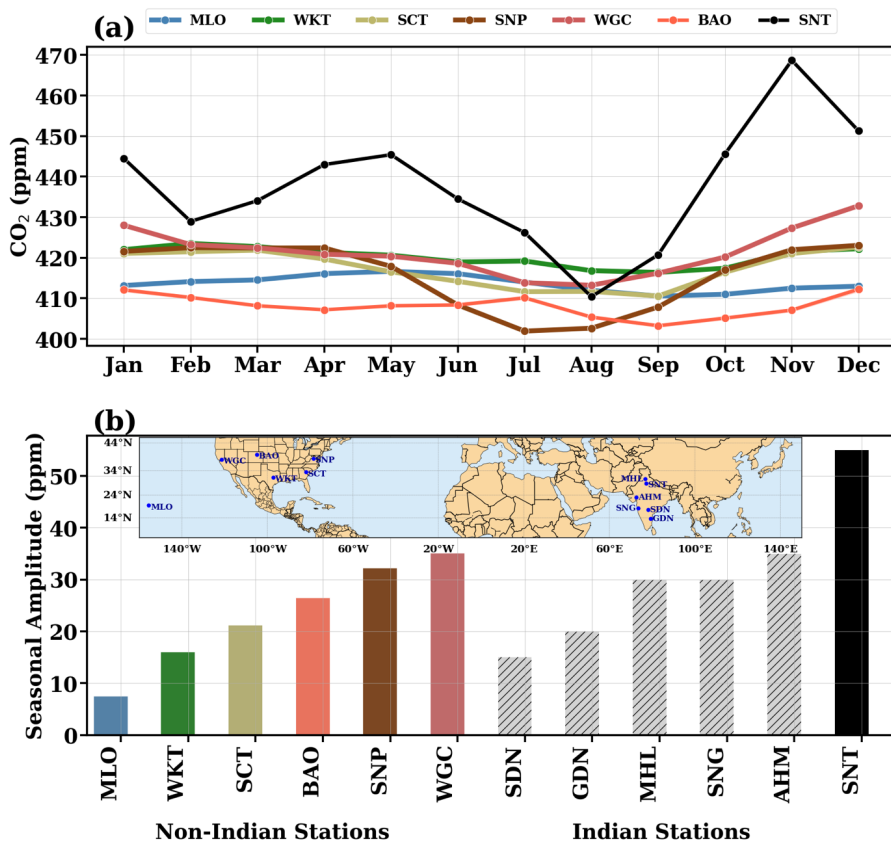

547 **Figure 9:** (a) Comparison of the seasonal variability of atmospheric CO<sub>2</sub> over Sonipat  
 548 monitoring station with various locations in the same latitudinal band. (b) Comparison of the  
 549 seasonal amplitude between Indian (coloured bars) and international monitoring stations (grey  
 550 bars). Indian stations include Shadnagar (SDN), Sinhadag (SNG), Ahmedabad (AHM), Mohali  
 551 bars).

552 (MHL), Gadanki (GDN), and Sonipat (SNT). International stations include Mauna Loa (MLO),  
553 South Carolina (SCT), Shenandoah National Park (SNP), Walnut Grove, (WGC), Moody  
554 (WKT) and Boulder (BAO). For all international stations except BAO, the five-year average  
555 (2018 - 2022) has been chosen for the seasonality. For BAO, 2011 – 2016 has been used due  
556 to lack of coinciding data. The monthly average of the entire study period (February 2023 –  
557 January 2025) has been used for this comparison.

558

#### 559 4. Discussions

560 By investigating two years of high-frequency atmospheric CO<sub>2</sub> mole fraction measurements at  
561 the Sonipat station in the IGP region, we identified the following salient features about the  
562 seasonality, diurnal variability, drivers of temporal variability, and emission sources of CO<sub>2</sub>.

563 **Very high atmospheric CO<sub>2</sub> mole fractions over IGP:** The surface-based  
564 measurements of atmospheric CO<sub>2</sub> mole fraction exhibit strong seasonality, with a maximum  
565 (456.4 ppm) during post-monsoon and a minimum (407.2 ppm) during monsoon, with an  
566 average of 422.6 ppm. Seasonal changes in the PBLH affected the atmospheric CO<sub>2</sub> mole  
567 fraction by diluting or concentrating GHG mole fractions near the surface. A strong dependence  
568 of CO<sub>2</sub> seasonality on local vegetative carbon uptake was observed from the negative  
569 correlation between NDVI and CO<sub>2</sub> mole fractions, which was consistent across India (Metya  
570 et al., 2021; Sreenivas et al., 2016; Tiwari et al., 2014).

571 A comparison of the seasonality of atmospheric CO<sub>2</sub> at Sonipat with other Indian and  
572 global sites in the same latitudinal band revealed very high seasonality at Sonipat, surpassing  
573 that of all other stations. This high seasonality is attributed to elevated CO<sub>2</sub> mole fractions in  
574 November (post-monsoon), driven by local emissions and crop residue burning. Figure 9a  
575 presents the monthly averaged variation of CO<sub>2</sub> over Sonipat during the study period (SNT)  
576 with other measurement sites in the same latitudinal band (5° N – 40° N). Details of all  
577 monitoring stations used in this study are described in detail in S1. Sonipat exhibits a very high  
578 seasonal amplitude (~60 ppm) compared to other sites worldwide (~15 ppm, see Figure 9b),  
579 attributed to the sharp increase in post-monsoon, consistent in both years of the study (see  
580 Figure 2). Excluding November would reduce the seasonal amplitude of Sonipat to 35 ppm,  
581 which is comparable to that in Ahmedabad (35 ppm). Temperature-driven PBLH (which  
582 inhibits mixing) and strong north-westerly winds (which induce transport of emissions from  
583 upwind) during this season play a key role in these high CO<sub>2</sub> mole fractions (Figure S3 and

Deleted: S2

585 ~~S4~~. It is also noted that the CO<sub>2</sub> drawdown in August is primarily due to the green paddy fields  
586 during the monsoon (terrestrial CO<sub>2</sub> uptake), coinciding with heavy rains that wash out CO<sub>2</sub>.  
587 This combined effect makes the lowest CO<sub>2</sub> mole fractions in Sonipat comparable to those at  
588 some background stations across the globe with different ecosystems (Figure 9a).

Deleted: S3

589 This study also analysed the drivers of this variability using various ecosystem variables,  
590 including NEE, which represents the net carbon exchange between terrestrial ecosystems (the  
591 difference between Rh and NPP). NPP is the net amount of CO<sub>2</sub> retained in the biosphere. Rh  
592 is the amount of CO<sub>2</sub> emitted into the atmosphere due to the decomposition of organic matter  
593 by microorganisms in the soil. Reco, the sum of Ra (autotrophic respiration) and Rh has been  
594 calculated as the difference of FluxSat GPP and GEOS-Chem NEE. GPP, a measure of carbon  
595 uptake by plants, was observed to be very high during monsoon along with NEE, Rh and Reco.  
596 Statistical analysis revealed a strong negative correlation of GPP with CO<sub>2</sub> and a strong positive  
597 correlation with Rh and Reco. These suggest that the primary sink of CO<sub>2</sub> over Sonipat is  
598 biospheric activity, driven by the abundance of vegetation resulting from enhanced soil  
599 moisture during the monsoon.

600 **Performance of models and satellites over IGP:** Although both the CarbonTracker  
601 and MIROC-ACTM models captured the broad seasonal pattern of CO<sub>2</sub> mole fractions, they  
602 substantially underestimated it. However, MIROC showed greater seasonal variability than  
603 CT2022, with post-monsoon highs and pre-monsoon drawdowns showing strong correlations  
604 with in situ measurements. Further analysis of the tracers from MIROC provides insights into  
605 the driving factors of this variability. The post-monsoon peak is attributed to vehicular  
606 emissions from the nearby highway and industrial sources upwind of the monitoring station.  
607 The drawdown in monsoon is attributed to the added soil moisture and increased CO<sub>2</sub> uptake  
608 by plants during this time. The location of the measurement site in IGP, downwind of Punjab,  
609 provides insights into this transport-induced enhancement. The OCO-2 and OCO-3 satellite  
610 XCO<sub>2</sub> retrievals also showed similar seasonal variability; however, the satellites could not  
611 capture CO<sub>2</sub> enhancements from local sources.

612 **Diurnal variability driven by meteorology:** The atmospheric CO<sub>2</sub> mole fraction at  
613 Sonipat exhibits a consistent diurnal pattern across seasons. It was observed that CO<sub>2</sub> mole  
614 fractions steadily increased throughout the night, reaching a peak in the early morning hours.  
615 This accumulation of CO<sub>2</sub> during the night-time can be attributed to the fumigation effect: a  
616 significant rise in surface mole fractions, notable during the early morning hours due to the

618 breakdown of the nocturnal inversion layer following sunrise (Stull, 1988). Weak winds and  
619 shallow PBLH enhance the fumigation effect. The combined effect of photosynthetic activity  
620 and mixing of PBLH during the afternoon hours drives the CO<sub>2</sub> mole fractions during different  
621 seasons. The diurnal amplitude shows large month-to-month variation with an increasing trend  
622 from May to September 2023 and a decreasing trend till February 2024. Figure S6 presents the  
623 seasonal variation of CO<sub>2</sub> compared with PBLH derived from Ceilometer and ERA5 reanalysis  
624 data for 2023. A slight shift in the timing of the morning peaks was observed from season to  
625 season, due to changes in sunrise time, which affected photosynthetic activity.

Deleted: S5

626 **Detecting emission source contributions:** Tracer-tracer relationships across different  
627 time periods during the post-monsoon and winter seasons were examined. Analysis reveals  
628 that CO<sub>2</sub> and CH<sub>4</sub> exhibit a strong positive correlation across all seasons, suggesting common  
629 sources for both gases. During monsoon season, the afternoon time window shows a weak  
630 correlation with other time windows, revealing distinct source and sink mechanisms for CO<sub>2</sub>  
631 and CH<sub>4</sub>, such as CH<sub>4</sub> loss via hydroxyl radical and CO<sub>2</sub> uptake by plants. The regression  
632 slope is higher during the post-monsoon and winter months, when reduced photosynthetic  
633 activity and the dominance of local emissions and long-range transport are observed. The  
634 lower values during pre-monsoon and monsoon are associated with the dominance of  
635 vegetation and terrestrial uptake of CO<sub>2</sub> by photosynthetic activity.

636 The CO/CO<sub>2</sub> correlation shows strong diurnal variability, suggesting the dominance of  
637 different source mechanisms throughout the day, with strong correlation during the morning  
638 and afternoon hours (suggesting a similar source) and weaker correlation during the evening  
639 and night hours (suggesting different sources). The post-monsoon season shows higher  
640 regression slopes due to reduced photosynthetic activity. Over Sonipat, the contribution of CO  
641 and CO<sub>2</sub> from long-range air mass transport (influenced by crop residue burning in Punjab)  
642 during post-monsoon from the northwest of the monitoring station is diluted by other sources  
643 (such as vehicular emissions from highways, crop residue burning, and open burning). The  
644 contribution of biofuel burning (which has a higher burning efficiency) during post-monsoon  
645 and winter (Andreae and Merlet, 2001) can also reduce the CO/CO<sub>2</sub> ratios. Figure S4 presents  
646 the wind patterns during the different seasons, revealing the predominant winds from the  
647 northwest during the post-monsoon season. The CO/CO<sub>2</sub> ratios reveal the combined influence  
648 of various sources around and upwind of the monitoring station during the post-monsoon  
649 period.

Deleted: S2

652 The CH<sub>4</sub>/CO correlation ( $r > 0.7$ ) was stronger during winter than during post-monsoon  
653 across all time windows, suggesting similar sources during winter and different sources during  
654 post-monsoon. The regression slope was higher during winter than during the post-monsoon  
655 period. This was traced to the lack of photosynthetic activity and the dominance of local  
656 emissions and long-range transport. Lin et al. (2015) reported comparable CH<sub>4</sub>/CO ratios at  
657 Pondicherry (PON) and Port Blair (PBL). CH<sub>4</sub> and CO emissions from biomass, biofuel  
658 burning and livestock estimated from EDGAR v4.2, 2011 indicate a CH<sub>4</sub>/CO ratio of 0.64 –  
659 0.69 over the Indian subcontinent from 2000-2008. These ratios are comparable to those  
660 observed during both seasons at Sonipat.

661 In summary, this study demonstrated that this high temporal CO<sub>2</sub> variability across the  
662 IGP region arises from an interplay of local anthropogenic and biomass-burning emissions,  
663 biospheric fluxes, and prevailing meteorology.

664

## 665 **5. Conclusions**

666 In this study, we conducted high frequency measurements of atmospheric CO<sub>2</sub> mole fractions  
667 at a suburban station in the Indo-Gangetic Plain, Sonipat and investigated the carbon cycle  
668 dynamics over IGP. The atmospheric CO<sub>2</sub> mole fractions from February 2023 to January 2025  
669 have been measured using a GHG analyser with laser-based cavity ring-down spectroscopy.  
670 CO<sub>2</sub> molefractions over Sonipat recorded an annual average of 440.8±19.7 parts per million  
671 (ppm) in 2024, with a very high seasonal variability of ~60 ppm, much higher than that of other  
672 monitoring stations in the same latitudnal band. Post-monsoon recorded the highest diurnal  
673 variability (~ 60 ppm) and monsoon recorded the least (~20 ppm) with a consistent diurnal  
674 pattern irrespective of season. By examining a series of observational and modelling data, such  
675 as ground-based and satellite-based measurements, three model outputs, ecosystem proxy  
676 variables, and the tracer-tracer analysis technique, we identified the drivers of the high temporal  
677 variability of CO<sub>2</sub> over Sonipat and the IGP region. First, this high seasonality is attributed to  
678 elevated CO<sub>2</sub> mole fractions in November (post-monsoon), driven by local emissions and crop  
679 residue burning. We found that biospheric activity was the primary driver of seasonal changes  
680 over Sonipat, with anthropogenic emissions and soil respiration as the major sources and  
681 photosynthetic carbon uptake as the major sink. In addition, boundary-layer dynamics and air-  
682 mass transport from upwind regions significantly contribute to the buildup of CO<sub>2</sub> mole  
683 fraction. Second, we found that although both the CarbonTracker and MIROC-ACTM models  
684 captured the broad seasonal pattern of CO<sub>2</sub> mole fractions, they substantially underestimated  
685 it. Moreover, the OCO-2 and OCO-3 satellite XCO<sub>2</sub> retrievals also showed similar seasonal

686 variability; however, the satellites could not capture CO<sub>2</sub> enhancements from local sources.  
687 Third, we found that the atmospheric CO<sub>2</sub> mole fraction at Sonipat exhibits a consistent diurnal  
688 pattern irrespective of season, with a maximum during the morning hours, attributed to the  
689 fumigation effect, followed by a gradual decrease during the day and a minimum during the  
690 afternoon hours, when photosynthetic activity is enhanced. Finally, tracer-tracer relationships  
691 across different time periods in the post-monsoon and winter seasons revealed common sources  
692 of CO<sub>2</sub> and CH<sub>4</sub>. The CO/CO<sub>2</sub> ratios reveal the combined influence of vehicular emissions,  
693 crop residue burning, and open burning on CO<sub>2</sub> mole fractions in Sonipat during the post-  
694 monsoon period. This study identified key sources and drivers of the high CO<sub>2</sub> temporal  
695 variability in a data-sparse IGP region. These findings advance our understanding of carbon  
696 cycle dynamics, with direct implications for mitigation and policy.

#### 697 **Data availability**

- 698 ● [The observational datasets used in this study are publicly available in a Zenodo](https://zenodo.org/record/19628722)  
699 [archive and can be accessed from 10.5281/zenodo.19628722](https://zenodo.org/record/19628722)
- 700 ● The OCO-2 and OCO-3 data is downloaded from <https://disc.gsfc.nasa.gov/datasets/>.  
701 This study utilizes the bias-corrected OCO-2 v11.1r data product  
702 ([https://disc.gsfc.nasa.gov/datasets/OCO2\\_L2\\_Lite\\_FP\\_11.1r/summary?keywords=oco](https://disc.gsfc.nasa.gov/datasets/OCO2_L2_Lite_FP_11.1r/summary?keywords=oco2)  
703 [2](https://disc.gsfc.nasa.gov/datasets/OCO2_L2_Lite_FP_11.1r/summary?keywords=oco2)) and the OCO-3 v10.4r data product  
704 ([https://disc.gsfc.nasa.gov/datasets/OCO3\\_L2\\_Lite\\_FP\\_10.4r/summary?keywords=oco](https://disc.gsfc.nasa.gov/datasets/OCO3_L2_Lite_FP_10.4r/summary?keywords=oco3)  
705 [3](https://disc.gsfc.nasa.gov/datasets/OCO3_L2_Lite_FP_10.4r/summary?keywords=oco3)).
- 706 ● The CT-2020 model outputs were downloaded from  
707 <https://gml.noaa.gov/aftp/products/carbontracker/co2/>. The CASA model outputs  
708 were downloaded from  
709 [https://disc.gsfc.nasa.gov/datasets/GEOS\\_CASAGFED\\_M\\_FLUX\\_3/summary?keyw](https://disc.gsfc.nasa.gov/datasets/GEOS_CASAGFED_M_FLUX_3/summary?keywords=CASA)  
710 [ords=CASA](https://disc.gsfc.nasa.gov/datasets/GEOS_CASAGFED_M_FLUX_3/summary?keywords=CASA).
- 711 ● The ERA5 reanalysis datasets were downloaded from  
712 <https://cds.climate.copernicus.eu/cdsapp#!/dataset/reanalysis-era5-single-levels>.
- 713 ● The satellite estimates of NDVI were downloaded from  
714 <https://www.ncei.noaa.gov/data/land-normalized-difference-vegetation-index/access/>.
- 715 ● This study utilises bias-corrected SIF data from OCO-2 v11r data product  
716 ([https://disc.gsfc.nasa.gov/datasets/OCO2\\_L2\\_Lite\\_SIF\\_11r/summary?keywords=oco](https://disc.gsfc.nasa.gov/datasets/OCO2_L2_Lite_SIF_11r/summary?keywords=oco2%20sif)  
717 [2%20sif](https://disc.gsfc.nasa.gov/datasets/OCO2_L2_Lite_SIF_11r/summary?keywords=oco2%20sif)).

- 718       • The FluxSat data is downloaded from  
719       [https://avdc.gsfc.nasa.gov/pub/tmp/FluxSat\\_GPP/](https://avdc.gsfc.nasa.gov/pub/tmp/FluxSat_GPP/). This study uses FluxSat version  
720       2.2 dataproduct.  
721       • The ObsPack data is available at <https://gml.noaa.gov/ccgg/obspack/data.php>. This  
722       study used ObsPack V2.0 dataproduct.  
723

724

**Acknowledgements:**

725 We acknowledge institutional support and funding provided by IIT Delhi and other  
726 stakeholders to develop the IIT Delhi Atmospheric Observatory at Sonipat. In particular, we  
727 thank Shahzad Gani (IIT Delhi) for his contribution to the observatory. We thank the Aakash  
728 Project team for providing trace gas data from the CUPI-G sensors. We acknowledge the OCO-  
729 2, OCO-3, CASA, CarbonTracker, and ERA5 teams for providing the data used in this study.  
730

731

732

**Author Contributions:**

733 **Conceptualization:** VJV, RKK, SP

734 **Data curation:** VJV, RKK, JR, DG, SD, [TN](#), YM, PKP

735 **Investigation, Methodology:** VJV, RKK, SP, PKP

736 **Software, Visualisation:** VJV

737 **Writing – original draft:** VJV

738 **Writing – review & editing:** RKK, SP, JR, DG, SD, YM, PKP

739

**Competing interests**

741 The authors declare that they have no conflict of interest.

742 **References**

- 743 Aburas, M. M., Abdullah, S. H., Ramli, M. F., and Ash'aari, Z. H.: Measuring Land Cover  
744 Change in Seremban, Malaysia Using NDVI Index, *Procedia Environmental Sciences*, 30,  
745 238–243, <https://doi.org/10.1016/j.proenv.2015.10.043>, 2015.
- 746 Ammoura, L., Xueref-Remy, I., Gros, V., Baudic, A., Bonsang, B., Petit, J.-E., Perrussel, O.,  
747 Bonnaire, N., Sciare, J., and Chevallier, F.: Atmospheric measurements of ratios between  
748 CO<sub>2</sub> and co-emitted species from traffic: a tunnel study in the Paris  
749 megacity, *Atmos. Chem. Phys.*, 14, 12871–12882, [https://doi.org/10.5194/acp-14-12871-](https://doi.org/10.5194/acp-14-12871-2014)  
750 2014, 2014.
- 751 Andreae, M. O. and Merlet, P.: Emission of trace gases and aerosols from biomass burning,  
752 *Global Biogeochemical Cycles*, 15, 955–966, <https://doi.org/10.1029/2000GB001382>, 2001.
- 753 Apadula, F., Cassardo, C., Ferrarese, S., Heltai, D., and Lanza, A.: Thirty Years of  
754 Atmospheric CO<sub>2</sub> Observations at the Plateau Rosa Station, Italy, *Atmosphere*, 10, 418,  
755 <https://doi.org/10.3390/atmos10070418>, 2019.
- 756 Baars, H., Ansmann, A., Engelmann, R., and Althausen, D.: Continuous monitoring of the  
757 boundary-layer top with lidar, *Atmospheric Chemistry and Physics*, 8, 7281–7296,  
758 <https://doi.org/10.5194/acp-8-7281-2008>, 2008.
- 759 Baker, A. K., Schuck, T. J., Brenninkmeijer, C. A. M., Rauthe-Schöch, A., Slemr, F., van  
760 Velthoven, P. F. J., and Lelieveld, J.: Estimating the contribution of monsoon-related  
761 biogenic production to methane emissions from South Asia using CARIBIC observations,  
762 *Geophysical Research Letters*, 39, <https://doi.org/10.1029/2012GL051756>, 2012.
- 763 Bakwin, P. S., Tans, P. S., Zhao, C., Ussler III, W., and Quesnell, E.: Measurements of  
764 carbon dioxide on a very tall tower, *Tellus B: Chemical and Physical Meteorology*, 47, 535–  
765 549, <https://doi.org/10.3402/tellusb.v47i5.16070>, 1995.
- 766 Bhattacharya, S. K., Borole, D. V., Francy, R. J., Allison, C. E., Steele, L. P., Krummel, P.,  
767 Langenfelds, R., Masarie, K. A., Tiwari, Y. K., and Patra, P. K.: Trace gases and CO<sub>2</sub> isotope  
768 records from Cabo de Rama, India, *Current Science*, 97, 1336–1344, 2009.
- 769 Bisht, J. S. H., Machida, T., Chandra, N., Tsuboi, K., Patra, P. K., Umezawa, T., Niwa, Y.,  
770 Sawa, Y., Morimoto, S., Nakazawa, T., Saitoh, N., and Takigawa, M.: Seasonal Variations of  
771 SF<sub>6</sub>, CO<sub>2</sub>, CH<sub>4</sub>, and N<sub>2</sub>O in the UT/LS Region due to Emissions, Transport, and Chemistry,  
772 *JGR Atmospheres*, 126, e2020JD033541, <https://doi.org/10.1029/2020JD033541>, 2021.
- 773 Brad Weir (2024), MiCASA Daily NPP Rh Fire Fuel Fluxes 0.1 degree × 0.1 degree V1,  
774 Greenbelt, MD, USA, NASA Center for Climate Simulation (NCCS) DataPortal, Accessed:  
775 [March 20, 2025], 10.5067/ZBXSA1LEN453
- 776 Byrne, B., Jones, D. B. A., Strong, K., Zeng, Z. -C., Deng, F., and Liu, J.: Sensitivity of CO<sub>2</sub>  
777 surface flux constraints to observational coverage, *JGR Atmospheres*, 122, 6672–6694,  
778 <https://doi.org/10.1002/2016JD026164>, 2017.
- 779 Chakraborty, S., Tiwari, Y. K., Deb Burman, P. K., Baidya Roy, S., and Valsala, V.:  
780 Observations and Modeling of GHG Concentrations and Fluxes Over India, in: Assessment

781 of Climate Change over the Indian Region: A Report of the Ministry of Earth Sciences  
782 (MoES), Government of India, edited by: Krishnan, R., Sanjay, J., Gnanaseelan, C.,  
783 Mujumdar, M., Kulkarni, A., and Chakraborty, S., Springer, Singapore, 73–92,  
784 [https://doi.org/10.1007/978-981-15-4327-2\\_4](https://doi.org/10.1007/978-981-15-4327-2_4), 2020.

785 Chandra, N., Lal, S., Venkataramani, S., Patra, P. K., and Sheel, V.: Temporal variations of  
786 atmospheric CO<sub>2</sub> and CO at Ahmedabad in western India, *Atmos.*  
787 *Chem. Phys.*, 16, 6153–6173, <https://doi.org/10.5194/acp-16-6153-2016>, 2016.

788 Chandra, N., Venkataramani, S., Lal, S., Patra, P. K., Ramonet, M., Lin, X., and Sharma, S.  
789 K.: Observational evidence of high methane emissions over a city in western India,  
790 *Atmospheric Environment*, 202, 41–52, <https://doi.org/10.1016/j.atmosenv.2019.01.007>,  
791 2019.

792 Chandra, N., Patra, P. K., Bisht, J. S. H., Ito, A., Umezawa, T., Saigusa, N., Morimoto, S.,  
793 Aoki, S., Janssens-Maenhout, G., Fujita, R., Takigawa, M., Watanabe, S., Saitoh, N., and  
794 Canadell, J. G.: Emissions from the Oil and Gas Sectors, Coal Mining and Ruminant Farming  
795 Drive Methane Growth over the Past Three Decades, *Journal of the Meteorological Society*  
796 *of Japan*, 99, 309–337, <https://doi.org/10.2151/jmsj.2021-015>, 2021.

797 Chandra, N., Patra, P. K., Niwa, Y., Ito, A., Iida, Y., Goto, D., Morimoto, S., Kondo, M.,  
798 Takigawa, M., Hajima, T., and Watanabe, M.: Estimated regional CO<sub>2</sub> flux and uncertainty  
799 based on an ensemble of atmospheric CO<sub>2</sub> inversions, *Atmos. Chem. Phys.*, 22, 9215–9243,  
800 <https://doi.org/10.5194/acp-22-9215-2022>, 2022.

801 Chen, H., Karion, A., Rella, C. W., Winderlich, J., Gerbig, C., Filges, A., Newberger, T.,  
802 Sweeney, C., and Tans, P. P.: Accurate measurements of carbon monoxide in humid air using  
803 the cavity ring-down spectroscopy (CRDS) technique, *Atmospheric Measurement*  
804 *Techniques*, 6, 1031–1040, <https://doi.org/10.5194/amt-6-1031-2013>, 2013.

805 Chen, Y., Hall, J., Van Wees, D., Andela, N., Hantson, S., Giglio, L., Van Der Werf, G. R.,  
806 Morton, D. C., and Randerson, J. T.: Multi-decadal trends and variability in burned area from  
807 the fifth version of the Global Fire Emissions Database (GFED5), *Earth Syst. Sci. Data*, 15,  
808 5227–5259, <https://doi.org/10.5194/essd-15-5227-2023>, 2023.

809 Crisp, D., Pollock, H. R., Rosenberg, R., Chapsky, L., Lee, R. A. M., Oyafuso, F. A.,  
810 Frankenberg, C., O'Dell, C. W., Bruegge, C. J., Doran, G. B., Eldering, A., Fisher, B. M., Fu,  
811 D., Gunson, M. R., Mandrake, L., Osterman, G. B., Schwandner, F. M., Sun, K., Taylor, T.  
812 E., Wennberg, P. O., and Wunch, D.: The on-orbit performance of the Orbiting Carbon  
813 Observatory-2 (OCO-2) instrument and its radiometrically calibrated products, *Atmos. Meas.*  
814 *Tech.*, 10, 59–81, <https://doi.org/10.5194/amt-10-59-2017>, 2017.

815 Das, C., Kunchala, R. K., Chandra, N., Chhabra, A., and Pandya, M. R.: Characterizing the  
816 regional XCO<sub>2</sub> variability and its association with ENSO over India inferred from GOSAT  
817 and OCO-2 satellite observations, *Science of The Total Environment*, 902, 166176,  
818 <https://doi.org/10.1016/j.scitotenv.2023.166176>, 2023.

819 Eldering, A., O'Dell, C. W., Wennberg, P. O., Crisp, D., Gunson, M. R., Viatte, C., Avis, C.,  
820 Braverman, A., Castano, R., Chang, A., Chapsky, L., Cheng, C., Connor, B., Dang, L.,  
821 Doran, G., Fisher, B., Frankenberg, C., Fu, D., Granat, R., Hobbs, J., Lee, R. A. M.,  
822 Mandrake, L., McDuffie, J., Miller, C. E., Myers, V., Natraj, V., O'Brien, D., Osterman, G.

823 B., Oyafuso, F., Payne, V. H., Pollock, H. R., Polonsky, I., Roehl, C. M., Rosenberg, R.,  
824 Schwandner, F., Smyth, M., Tang, V., Taylor, T. E., To, C., Wunch, D., and Yoshimizu, J.:  
825 The Orbiting Carbon Observatory-2: first 18 months of science data products, *Atmos. Meas.*  
826 *Tech.*, 10, 549–563, <https://doi.org/10.5194/amt-10-549-2017>, 2017.

827 Eldering, A., Taylor, T. E., O'Dell, C. W., and Pavlick, R.: The OCO-3 mission:  
828 measurement objectives and expected performance based on 1 year of simulated data, *Atmos.*  
829 *Meas. Tech.*, 12, 2341–2370, <https://doi.org/10.5194/amt-12-2341-2019>, 2019.

830 Fan, N., & Forkel, M. (2025). Drivers of the enhanced amplitude of atmospheric CO<sub>2</sub> in  
831 northern terrestrial ecosystems. <https://doi.org/10.5194/egusphere-egu25-7279>

832 Fang, S. X., Tans, P. P., Steinbacher, M., Zhou, L. X., and Luan, T.: Comparison of the  
833 regional CO<sub>2</sub> mole fraction filtering approaches at a WMO/GAW regional station in China,  
834 *Atmospheric Measurement Techniques*, 8, 5301–5313, [https://doi.org/10.5194/amt-8-5301-](https://doi.org/10.5194/amt-8-5301-2015)  
835 2015, 2015.

836 Fawzy, S., Osman, A. I., Doran, J., and Rooney, D. W.: Strategies for mitigation of climate  
837 change: a review, *Environ Chem Lett*, 18, 2069–2094, [https://doi.org/10.1007/s10311-020-](https://doi.org/10.1007/s10311-020-01059-w)  
838 01059-w, 2020.

839 Frankenberg, C., O'Dell, C., Berry, J., Guanter, L., Joiner, J., Köhler, P., Pollock, R., and  
840 Taylor, T. E.: Prospects for chlorophyll fluorescence remote sensing from the Orbiting  
841 Carbon Observatory-2, *Remote Sensing of Environment*, 147, 1–12,  
842 <https://doi.org/10.1016/j.rse.2014.02.007>, 2014.

843 Friedlingstein, P., O'Sullivan, M., Jones, M. W., Andrew, R. M., Hauck, J., Landschützer, P.,  
844 Le Quéré, C., Li, H., Luijckx, I. T., Olsen, A., Peters, G. P., Peters, W., Pongratz, J.,  
845 Schwingshackl, C., Sitch, S., Canadell, J. G., Ciais, P., Jackson, R. B., Alin, S. R., Arneeth, A.,  
846 Arora, V., Bates, N. R., Becker, M., Bellouin, N., Berghoff, C. F., Bittig, H. C., Bopp, L.,  
847 Cadule, P., Campbell, K., Chamberlain, M. A., Chandra, N., Chevallier, F., Chini, L. P.,  
848 Colligan, T., Decayeux, J., Djeutchouang, L. M., Dou, X., Duran Rojas, C., Enyo, K., Evans,  
849 W., Fay, A. R., Feely, R. A., Ford, D. J., Foster, A., Gasser, T., Gehlen, M., Gkritzalis, T.,  
850 Grassi, G., Gregor, L., Gruber, N., Gürses, Ö., Harris, I., Hefner, M., Heinke, J., Hurtt, G. C.,  
851 Iida, Y., Ilyina, T., Jacobson, A. R., Jain, A. K., Jarníková, T., Jersild, A., Jiang, F., Jin, Z.,  
852 Kato, E., Keeling, R. F., Klein Goldewijk, K., Knauer, J., Korsbakken, J. I., Lan, X., Lauvset,  
853 S. K., Lefèvre, N., Liu, Z., Liu, J., Ma, L., Maksyutov, S., Marland, G., Mayot, N., McGuire,  
854 P. C., Metzl, N., Monacci, N. M., Morgan, E. J., Nakaoka, S.-I., Neill, C., Niwa, Y., Nützel,  
855 T., Olivier, L., Ono, T., Palmer, P. I., Pierrot, D., Qin, Z., Resplandy, L., Roobaert, A.,  
856 Rosan, T. M., Rödenbeck, C., Schwinger, J., Smallman, T. L., Smith, S. M., Sospedra-  
857 Alfonso, R., Steinhoff, T., et al.: Global Carbon Budget 2024, *Earth Syst. Sci. Data*, 17, 965–  
858 1039, <https://doi.org/10.5194/essd-17-965-2025>, 2025.

859 Halder, S., Tiwari, Y. K., Valsala, V., Sreeush, M. G., Sijikumar, S., Janardanan, R., &  
860 Maksyutov, S. (2021). Quantification of enhancement in atmospheric CO<sub>2</sub> background due to  
861 Indian biospheric fluxes and fossil fuel emissions. *Journal of Geophysical Research:*  
862 *Atmospheres*, 126(13), e2021JD034545.

863 Harriss, R. C., Sachse, G. W., Collins Jr., J. E., Wade, L., Bartlett, K. B., Talbot, R. W.,  
864 Browell, E. V., Barrie, L. A., Hill, G. F., and Burney, L. G.: Carbon monoxide and methane

865 over Canada: July–August 1990, *Journal of Geophysical Research: Atmospheres*, 99, 1659–  
866 1669, <https://doi.org/10.1029/93JD01906>, 1994.

867 Huang, J., Golombek, A., Prinn, R., Weiss, R., Fraser, P., Simmonds, P., Dlugokencky, E. J.,  
868 Hall, B., Elkins, J., Steele, P., Langenfelds, R., Krummel, P., Dutton, G., and Porter, L.:  
869 Estimation of regional emissions of nitrous oxide from 1997 to 2005 using multinetwork  
870 measurements, a chemical transport model, and an inverse method, *Journal of Geophysical  
871 Research: Atmospheres*, 113, <https://doi.org/10.1029/2007JD009381>, 2008.

872 Huang, J., Yu, H., Guan, X., Wang, G., and Guo, R.: Accelerated dryland expansion under  
873 climate change, *Nature Clim Change*, 6, 166–171, <https://doi.org/10.1038/nclimate2837>,  
874 2016.

875 IPCC, 2021: *Climate Change 2021: The Physical Science Basis. Contribution of Working  
876 Group I to the Sixth Assessment Report of the Intergovernmental Panel on Climate  
877 Change*[Masson-Delmotte, V., P. Zhai, A. Pirani, S.L. Connors, C. Péan, S. Berger, N. Caud,  
878 Y. Chen, L. Goldfarb, M.I. Gomis, M. Huang, K. Leitzell, E. Lonnoy, J.B.R. Matthews, T.K.  
879 Maycock, T. Waterfield, O. Yelekçi, R. Yu, and B. Zhou (eds.)]. Cambridge University  
880 Press, Cambridge, United Kingdom and New York, NY, USA, In press,  
881 doi:10.1017/9781009157896.

882 Ito, A.: Disequilibrium of terrestrial ecosystem CO<sub>2</sub> budget caused by disturbance-induced  
883 emissions and non-CO<sub>2</sub> carbon export flows: a global model assessment, *Earth Syst. Dynam.*,  
884 10, 685–709, <https://doi.org/10.5194/esd-10-685-2019>, 2019.

885 Jain, C. D., Singh, V., Akhil Raj, S. T., Madhavan, B. L., and Ratnam, M. V.: Local emission  
886 and long-range transport impacts on the CO, CO<sub>2</sub>, and CH<sub>4</sub> concentrations at a tropical rural  
887 site, *Atmospheric Environment*, 254, 118397,  
888 <https://doi.org/10.1016/j.atmosenv.2021.118397>, 2021.

889 Jing, X., Huang, J., Wang, G., Higuchi, K., Bi, J., Sun, Y., Yu, H., and Wang, T.: The effects  
890 of clouds and aerosols on net ecosystem CO<sub>2</sub> exchange over semi-arid Loess Plateau of  
891 Northwest China, *Atmospheric Chemistry and Physics*, 10, 8205–8218,  
892 <https://doi.org/10.5194/acp-10-8205-2010>, 2010.

893 Joiner, J. and Yoshida, Y.: Satellite-based reflectances capture large fraction of variability in  
894 global gross primary production (GPP) at weekly time scales, *Agricultural and Forest  
895 Meteorology*, 291, 108092, <https://doi.org/10.1016/j.agrformet.2020.108092>, 2020.

896 Joiner, J., Yoshida, Y., Zhang, Y., Duveiller, G., Jung, M., Lyapustin, A., Wang, Y., and  
897 Tucker, C. J.: Estimation of Terrestrial Global Gross Primary Production (GPP) with Satellite  
898 Data-Driven Models and Eddy Covariance Flux Data, *Remote Sensing*, 10, 1346,  
899 <https://doi.org/10.3390/rs10091346>, 2018.

900 Jones, M. W., Andrew, R. M., Peters, G. P., Janssens-Maenhout, G., De-Gol, A. J., Ciais, P.,  
901 Patra, P. K., Chevallier, F., and Le Quéré, C.: Gridded fossil CO<sub>2</sub> emissions and related O<sub>2</sub>  
902 combustion consistent with national inventories 1959–2018, *Sci Data*, 8, 2,  
903 <https://doi.org/10.1038/s41597-020-00779-6>, 2021.

904 Kar, J., Bremer, H., Drummond, J. R., Rochon, Y. J., Jones, D. B. A., Nichitiu, F., Zou, J.,  
905 Liu, J., Gille, J. C., Edwards, D. P., Deeter, M. N., Francis, G., Ziskin, D., and Warner, J.:

906 Evidence of vertical transport of carbon monoxide from Measurements of Pollution in the  
907 Troposphere (MOPITT), *Geophysical Research Letters*, 31,  
908 <https://doi.org/10.1029/2004GL021128>, 2004.

909 Krishnapriya, M., Pattanaik, D. R., Kumar, A., Ramana, M. V., & Naidu, C. V. (2025).  
910 Spatio-temporal dynamics of atmospheric CO<sub>2</sub> over India and its inter-relationship with  
911 combustion emissions, ecosystem exchange, and meteorological factors: M Krishnapriya et  
912 al. *Journal of Earth System Science*, 134(4), 193.

913 Krol, M., Houweling, S., Bregman, B., van den Broek, M., Segers, A., van Velthoven, P.,  
914 Peters, W., Dentener, F., and Bergamaschi, P.: The two-way nested global chemistry-  
915 transport zoom model TM5: algorithm and applications, *Atmospheric Chemistry and Physics*  
916 *Discussions*, 4, 3975–4018, 2004.

917 Kumar, A., Yu, Z.-G., Klemeš, J. J., and Bokhari, A.: A state-of-the-art review of greenhouse  
918 gas emissions from Indian hydropower reservoirs, *Journal of Cleaner Production*, 320,  
919 128806, <https://doi.org/10.1016/j.jclepro.2021.128806>, 2021.

920 Kunchala, R. K., Girach, I., Das, C., Jain, C., Burman, P. K. D., Pathakoti, M., ... & Jain, V.  
921 (2025). Carbon dioxide (CO<sub>2</sub>) variations across India: Synthesis of observations and model  
922 simulations. *Atmospheric Environment*, 121746.

923 Kunchala, R. K., Patra, P. K., Kumar, K. N., Chandra, N., Attada, R., and Karumuri, R. K.:  
924 Spatio-temporal variability of XCO<sub>2</sub> over Indian region inferred from Orbiting Carbon  
925 Observatory (OCO-2) satellite and Chemistry Transport Model, *Atmospheric Research*, 269,  
926 106044, <https://doi.org/10.1016/j.atmosres.2022.106044>, 2022.

927 Kuttippurath, J., Peter, R., Singh, A., and Raj, S.: The increasing atmospheric CO<sub>2</sub> over  
928 India: Comparison to global trends, *iScience*, 25, 104863,  
929 <https://doi.org/10.1016/j.isci.2022.104863>, 2022.

930 Lai, S. C., Baker, A. K., Schuck, T. J., van Velthoven, P., Oram, D. E., Zahn, A., Hermann,  
931 M., Weigelt, A., Slemr, F., Brenninkmeijer, C. a. M., and Ziereis, H.: Pollution events  
932 observed during CARIBIC flights in the upper troposphere between South China and the  
933 Philippines, *Atmospheric Chemistry and Physics*, 10, 1649–1660,  
934 <https://doi.org/10.5194/acp-10-1649-2010>, 2010.

935 Le Quéré, C., Andrew, R. M., Friedlingstein, P., Sitch, S., Pongratz, J., Manning, A. C.,  
936 Korsbakken, J. I., Peters, G. P., Canadell, J. G., Jackson, R. B., Boden, T. A., Tans, P. P.,  
937 Andrews, O. D., Arora, V. K., Bakker, D. C. E., Barbero, L., Becker, M., Betts, R. A., Bopp,  
938 L., Chevallier, F., Chini, L. P., Ciais, P., Cosca, C. E., Cross, J., Currie, K., Gasser, T., Harris,  
939 I., Hauck, J., Haverd, V., Houghton, R. A., Hunt, C. W., Hurtt, G., Ilyina, T., Jain, A. K.,  
940 Kato, E., Kautz, M., Keeling, R. F., Klein Goldewijk, K., Körtzinger, A., Landschützer, P.,  
941 Lefèvre, N., Lenton, A., Lienert, S., Lima, I., Lombardozzi, D., Metzl, N., Millero, F.,  
942 Monteiro, P. M. S., Munro, D. R., Nabel, J. E. M. S., Nakaoka, S., Nojiri, Y., Padin, X. A.,  
943 Pregon, A., Pfeil, B., Pierrot, D., Poulter, B., Rehder, G., Reimer, J., Rödenbeck, C.,  
944 Schwinger, J., Séférian, R., Skjelvan, I., Stocker, B. D., Tian, H., Tilbrook, B., Tubiello, F.  
945 N., Van Der Laan-Luijkx, I. T., Van Der Werf, G. R., Van Heuven, S., Viovy, N., Vuichard,  
946 N., Walker, A. P., Watson, A. J., Wiltshire, A. J., Zaehle, S., and Zhu, D.: Global Carbon  
947 Budget 2017, *Earth Syst. Sci. Data*, 10, 405–448, <https://doi.org/10.5194/essd-10-405-2018>,  
948 2018.

949 [ICOS RI, 2020. ICOS Atmosphere Station Specifications, V2.0 \(editor: O. Laurent\). ICOS](#)  
950 [ERIC. <https://doi.org/10.18160/GK28-2188>](#)  
951  
952 Lin, X., Indira, N. K., Ramonet, M., Delmotte, M., Ciais, P., Bhatt, B. C., Reddy, M. V.,  
953 Angchuk, D., Balakrishnan, S., Jorphail, S., Dorjai, T., Mahey, T. T., Patnaik, S., Begum, M.,  
954 Brenninkmeijer, C., Durairaj, S., Kirubakaran, R., Schmidt, M., Swathi, P. S., Vinithkumar,  
955 N. V., Yver Kwok, C., and Gaur, V. K.: Long-lived atmospheric trace gases measurements in  
956 flask samples from three stations in India, *Atmos. Chem. Phys.*, 15, 9819–9849,  
957 <https://doi.org/10.5194/acp-15-9819-2015>, 2015.

958 Lin, X., Ciais, P., Bousquet, P., Ramonet, M., Yin, Y., Balkanski, Y., Cozic, A., Delmotte,  
959 M., Evangeliou, N., Indira, N. K., Locatelli, R., Peng, S., Piao, S., Saunio, M., Swathi, P. S.,  
960 Wang, R., Yver-Kwok, C., Tiwari, Y. K., and Zhou, L.: Simulating CH<sub>4</sub> and CO<sub>2</sub> over South  
961 and East Asia using the zoomed chemistry transport model LMDz-INCA, *Atmos. Chem.*  
962 *Phys.*, 18, 9475–9497, <https://doi.org/10.5194/acp-18-9475-2018>, 2018.

963 Liu, J., Bowman, K. W., Lee, M., Henze, D. K., Bousserez, N., Brix, H., Collatz, G. J.,  
964 Menemenlis, D., Ott, L., Pawson, S., Jones, D., and Nassar, R.: Carbon monitoring system  
965 flux estimation and attribution: impact of ACOS-GOSAT XCO<sub>2</sub> sampling on the inference of  
966 terrestrial biospheric sources and sinks, *Tellus B: Chemical and Physical Meteorology*, 66,  
967 22486, <https://doi.org/10.3402/tellusb.v66.22486>, 2014.

968 Lopez, M.: Estimation des émissions de gaz à effet de serre à différentes échelles en France à  
969 l'aide d'observations de haute précision, phdthesis, Université Paris Sud - Paris XI, 2012.

970 Mahesh, P., Sreenivas, G., Rao, P. V. N., Dadhwal, V. K., Sai Krishna, S. V. S., and  
971 Mallikarjun, K.: High-precision surface-level CO<sub>2</sub> and CH<sub>4</sub> using off-axis integrated cavity  
972 output spectroscopy (OA-ICOS) over Shadnagar, India, *International Journal of Remote*  
973 *Sensing*, 36, 5754–5765, <https://doi.org/10.1080/01431161.2015.1104744>, 2015.

974 [Mangaraj, P., Matsumi, Y., Nakayama, T., Biswal, A., Yamaji, K., Araki, H., ... & Mor, S.](#)  
975 [\(2025\). Weak coupling of observed surface PM2.5 in Delhi-NCR with rice crop residue](#)  
976 [burning in Punjab and Haryana. \*Npj Climate and Atmospheric Science\*, 8\(1\), 18.](#)

977 Masarie, K. A., Peters, W., Jacobson, A. R., and Tans, P. P.: ObsPack: a framework for the  
978 preparation, delivery, and attribution of atmospheric greenhouse gas measurements, *Earth*  
979 *Syst. Sci. Data*, 6, 375–384, <https://doi.org/10.5194/essd-6-375-2014>, 2014.

980 Matsueda, H., Inoue, H. Y., Ishii, M., and Tsutsumi, Y.: Large injection of carbon monoxide  
981 into the upper troposphere due to intense biomass burning in 1997, *J. Geophys. Res.*, 104,  
982 26867–26879, <https://doi.org/10.1029/1999JD900193>, 1999.

983 Mauzerall, D. L., Logan, J. A., Jacob, D. J., Anderson, B. E., Blake, D. R., Bradshaw, J. D.,  
984 Heikes, B., Sachse, G. W., Singh, H., and Talbot, B.: Photochemistry in biomass burning  
985 plumes and implications for tropospheric ozone over the tropical South Atlantic, *J. Geophys.*  
986 *Res.*, 103, 8401–8423, <https://doi.org/10.1029/97JD02612>, 1998.

987 Metya, A., Datye, A., Chakraborty, S., Tiwari, Y. K., Sarma, D., Bora, A., and Gogoi, N.:  
988 Diurnal and seasonal variability of CO<sub>2</sub> and CH<sub>4</sub> concentration in a semi-urban environment  
989 of western India, *Sci Rep*, 11, 2931, <https://doi.org/10.1038/s41598-021-82321-1>, 2021.

Deleted: Laurent, O., 2016.

Deleted: Atmospheric

Deleted: .

Formatted: Space After: 0 pt, Border: Top: (No border),  
Bottom: (No border), Left: (No border), Right: (No border),  
Between : (No border)

- 993 Mühle, J., Brenninkmeijer, C. a. M., Rhee, T. S., Slemr, F., Oram, D. E., Penkett, S. A., and  
 994 Zahn, A.: Biomass burning and fossil fuel signatures in the upper troposphere observed  
 995 during a CARIBIC flight from Namibia to Germany, *Geophysical Research Letters*, 29, 16-1-  
 996 16-4, <https://doi.org/10.1029/2002GL015764>, 2002.
- 997 Munksgaard, N. C., Lee, I. L., Napier, T. P., Zwart, C., Cernusak, L. A., & Bird, M. I. (2022).  
 998 One year of spectroscopic high-frequency measurements of atmospheric CO<sub>2</sub>, CH<sub>4</sub>, H.  
 999 *Geoscience Data Journal*. <https://doi.org/10.1002/gdj3.180>
- 1000 Nalini, K., Sijikumar, S., Valsala, V., Tiwari, Y. K., and Ramachandran, R.: Designing  
 1001 surface CO<sub>2</sub> monitoring network to constrain the Indian land fluxes, *Atmospheric*  
 1002 *Environment*, 218, 117003, <https://doi.org/10.1016/j.atmosenv.2019.117003>, 2019.
- 1003 Nath, B.: Quantitative Assessment of Forest Cover Change of a Part of Bandarban Hill Tracts  
 1004 Using NDVI Techniques, *Journal of Geosciences and Geomatics*, 2, 21–27,  
 1005 <https://doi.org/10.12691/jgg-2-1-4>, 2014.
- 1006 Nishanth, T., Praseed, K. M., Kumar, M. K. S., and Valsaraj, K. T.: Observational Study of  
 1007 Surface O<sub>3</sub>, NO<sub>x</sub>, CH<sub>4</sub> and Total NMHCs at Kannur, India, *Aerosol Air Qual. Res.*, 14,  
 1008 1074–1088, <https://doi.org/10.4209/aaqr.2012.11.0323>, 2014.
- 1009 Niwa, Y., Machida, T., Sawa, Y., Matsueda, H., Schuck, T. J., Brenninkmeijer, C. A. M.,  
 1010 Imasu, R., and Satoh, M.: Imposing strong constraints on tropical terrestrial CO<sub>2</sub> fluxes using  
 1011 passenger aircraft based measurements, *Journal of Geophysical Research: Atmospheres*, 117,  
 1012 <https://doi.org/10.1029/2012JD017474>, 2012.
- 1013 Nomura, S., Naja, M., Ahmed, M. K., Mukai, H., Terao, Y., Machida, T., Sasakawa, M., and  
 1014 Patra, P. K.: Measurement report: Regional characteristics of seasonal and long-term  
 1015 variations in greenhouse gases at Nainital, India, and Comilla, Bangladesh, *Atmos. Chem.*  
 1016 *Phys.*, 21, 16427–16452, <https://doi.org/10.5194/acp-21-16427-2021>, 2021.
- 1017 Paris, J.-D., Ciais, P., Nédélec, P., Ramonet, M., Belan, B. D., Arshinov, M. Yu., Golitsyn, G.  
 1018 S., Granberg, I., Stohl, A., Cayez, G., Athier, G., Boumard, F., and Cousin, J.-M.: The YAK-  
 1019 AEROSIB transcontinental aircraft campaigns: new insights on the transport of CO<sub>2</sub>, CO and  
 1020 O<sub>3</sub> across Siberia, *Tellus B: Chemical and Physical Meteorology*, 60, 551–568,  
 1021 <https://doi.org/10.1111/j.1600-0889.2008.00369.x>, 2008.
- 1022 Park, M., Randel, W. J., Emmons, L. K., and Livesey, N. J.: Transport pathways of carbon  
 1023 monoxide in the Asian summer monsoon diagnosed from Model of Ozone and Related  
 1024 Tracers (MOZART), *J. Geophys. Res.*, 114, 2008JD010621,  
 1025 <https://doi.org/10.1029/2008JD010621>, 2009.
- 1026 Pathakoti, M., D.V., M., Gaddamidi, S., Arun, S. S., Bothale, R. V., Chauhan, P., P, R., K.S.,  
 1027 R., and Chandra, N.: Three-dimensional view of CO<sub>2</sub> variability in the atmosphere over the  
 1028 Indian region, *Atmospheric Research*, 290, 106785,  
 1029 <https://doi.org/10.1016/j.atmosres.2023.106785>, 2023.
- 1030 Patil, M. N., Dharmaraj, T., Waghmare, R. T., Prabha, T. V., and Kulkarni, J. R.:  
 1031 Measurements of carbon dioxide and heat fluxes during monsoon-2011 season over rural site  
 1032 of India by eddy covariance technique, *J Earth Syst Sci*, 123, 177–185,  
 1033 <https://doi.org/10.1007/s12040-013-0374-z>, 2014.

1034 Patra, P. K., Niwa, Y., Schuck, T. J., Brenninkmeijer, C. a. M., Machida, T., Matsueda, H.,  
 1035 and Sawa, Y.: Carbon balance of South Asia constrained by passenger aircraft CO<sub>2</sub>  
 1036 measurements, *Atmospheric Chemistry and Physics*, 11, 4163–4175,  
 1037 <https://doi.org/10.5194/acp-11-4163-2011>, 2011.

1038 Patra, P. K., Canadell, J. G., Houghton, R. A., Piao, S. L., Oh, N.-H., Ciais, P., Manjunath, K.  
 1039 R., Chhabra, A., Wang, T., Bhattacharya, T., Bousquet, P., Hartman, J., Ito, A., Mayorga, E.,  
 1040 Niwa, Y., Raymond, P. A., Sarma, V. V. S. S., and Lasco, R.: The carbon budget of South  
 1041 Asia, *Biogeosciences*, 10, 513–527, <https://doi.org/10.5194/bg-10-513-2013>, 2013.

1042 Patra, P. K., Crisp, D., Kaiser, J. W., Wunch, D., Saeki, T., Ichii, K., Sekiya, T., Wennberg,  
 1043 P. O., Feist, D. G., Pollard, D. F., Griffith, D. W. T., Velazco, V. A., De Maziere, M., Sha, M.  
 1044 K., Roehl, C., Chatterjee, A., and Ishijima, K.: The Orbiting Carbon Observatory (OCO-2)  
 1045 tracks 2–3 peta-gram increase in carbon release to the atmosphere during the 2014–2016 El  
 1046 Niño, *Sci Rep*, 7, 13567, <https://doi.org/10.1038/s41598-017-13459-0>, 2017.

1047 Patra, P. K., Takigawa, M., Watanabe, S., Chandra, N., Ishijima, K., and Yamashita, Y.:  
 1048 Improved Chemical Tracer Simulation by MIROC4.0-based Atmospheric Chemistry-  
 1049 Transport Model (MIROC4-ACTM), *Sola*, 14, 91–96, <https://doi.org/10.2151/sola.2018-016>,  
 1050 2018.

1051 Peters, W., Miller, J. B., Whitaker, J., Denning, A. S., Hirsch, A., Krol, M. C., Zupanski, D.,  
 1052 Bruhwiler, L., and Tans, P. P.: An ensemble data assimilation system to estimate CO<sub>2</sub> surface  
 1053 fluxes from atmospheric trace gas observations, *Journal of Geophysical Research:  
 1054 Atmospheres*, 110, <https://doi.org/10.1029/2005JD006157>, 2005.

1055 Philip, S., Johnson, M. S., Potter, C., Genovesse, V., Baker, D. F., Haynes, K. D., Henze, D.  
 1056 K., Liu, J., and Poulter, B.: Prior biosphere model impact on global terrestrial CO<sub>2</sub> fluxes  
 1057 estimated from OCO-2 retrievals, *Atmos. Chem. Phys.*, 19, 13267–13287,  
 1058 <https://doi.org/10.5194/acp-19-13267-2019>, 2019.

1059 Philip, S., Johnson, M. S., Baker, D. F., Basu, S., Tiwari, Y. K., Indira, N. K., Ramonet, M.,  
 1060 and Poulter, B.: OCO-2 Satellite-Imposed Constraints on Terrestrial Biospheric CO<sub>2</sub> Fluxes  
 1061 Over South Asia, *JGR Atmospheres*, 127, e2021JD035035,  
 1062 <https://doi.org/10.1029/2021JD035035>, 2022.

1063 Potter, C. S., Randerson, J. T., Field, C. B., Matson, P. A., Vitousek, P. M., Mooney, H. A.,  
 1064 and Klooster, S. A.: Terrestrial ecosystem production: A process model based on global  
 1065 satellite and surface data, *Global Biogeochemical Cycles*, 7, 811–841,  
 1066 <https://doi.org/10.1029/93GB02725>, 1993.

1067 Randel, W. J. and Park, M.: Deep convective influence on the Asian summer monsoon  
 1068 anticyclone and associated tracer variability observed with Atmospheric Infrared Sounder  
 1069 (AIRS), *Journal of Geophysical Research: Atmospheres*, 111,  
 1070 <https://doi.org/10.1029/2005JD006490>, 2006.

1071 Randerson, J. T., Thompson, M. V., Conway, T. J., Fung, I. Y., and Field, C. B.: The  
 1072 contribution of terrestrial sources and sinks to trends in the seasonal cycle of atmospheric  
 1073 carbon dioxide, *Global Biogeochemical Cycles*, 11, 535–560,  
 1074 <https://doi.org/10.1029/97GB02268>, 1997.

- 1075 Rathore, J., Ganguly, D., Singh, V., Gupta, M., Vazhathara, V. J., Biswal, A., Kunchala, R.  
 1076 K., Patra, P. K., Sahu, L. K., Gani, S., and Dey, S.: Characteristics of Haze Pollution Events  
 1077 During Biomass Burning Period at an Upwind Site of Delhi, *JGR Atmospheres*, 130,  
 1078 e2024JD042347, <https://doi.org/10.1029/2024JD042347>, 2025.
- 1079 Rayner, P. J., Law, R. M., Allison, C. E., Francey, R. J., Trudinger, C. M., and Pickett-Heaps,  
 1080 C.: Interannual variability of the global carbon cycle (1992–2005) inferred by inversion of  
 1081 atmospheric CO<sub>2</sub> and δ<sup>13</sup>CO<sub>2</sub> measurements, *Global Biogeochemical Cycles*, 22,  
 1082 <https://doi.org/10.1029/2007GB003068>, 2008.
- 1083 Reid, K. H. and Steyn, D. G.: Diurnal variations of boundary-layer carbon dioxide in a  
 1084 coastal city—Observations and comparison with model results, *Atmospheric Environment*,  
 1085 31, 3101–3114, [https://doi.org/10.1016/S1352-2310\(97\)00050-2](https://doi.org/10.1016/S1352-2310(97)00050-2), 1997.
- 1086 Russo, R. S., Talbot, R. W., Dibb, J. E., Scheuer, E., Seid, G., Jordan, C. E., Fuelberg, H. E.,  
 1087 Sachse, G. W., Avery, M. A., Vay, S. A., Blake, D. R., Blake, N. J., Atlas, E., Fried, A.,  
 1088 Sandholm, S. T., Tan, D., Singh, H. B., Snow, J., and Heikes, B. G.: Chemical composition  
 1089 of Asian continental outflow over the western Pacific: Results from Transport and Chemical  
 1090 Evolution over the Pacific (TRACE-P), *Journal of Geophysical Research: Atmospheres*, 108,  
 1091 <https://doi.org/10.1029/2002JD003184>, 2003.
- 1092 Sawa, Y., Matsueda, H., Makino, Y., Inoue, H. Y., Murayama, S., Hirota, M., Tsutsumi, Y.,  
 1093 Zaizen, Y., Ikegami, M., and Okada, K.: Aircraft Observation of CO<sub>2</sub>, CO<sub>2</sub> O<sub>3</sub> and H<sub>2</sub> over  
 1094 the North Pacific during the PACE-7 Campaign, *Tellus B: Chemical and Physical*  
 1095 *Meteorology*, 56, 2, <https://doi.org/10.3402/tellusb.v56i1.16402>, 2004.
- 1096 Schaaf, C. and Wang, Z.: MODIS/Terra+Aqua BRDF/Albedo Nadir BRDF-Adjusted Ref  
 1097 Band6 Daily L3 Global 30ArcSec CMG V061,  
 1098 <https://doi.org/10.5067/MODIS/MCD43D67.061>, 2021.
- 1099 Schaaf, C. B., Gao, F., Strahler, A. H., Lucht, W., Li, X., Tsang, T., Strugnell, N. C., Zhang,  
 1100 X., Jin, Y., Muller, J.-P., Lewis, P., Barnsley, M., Hobson, P., Disney, M., Roberts, G.,  
 1101 Dunderdale, M., Doll, C., d'Entremont, R. P., Hu, B., Liang, S., Privette, J. L., and Roy, D.:  
 1102 First operational BRDF, albedo nadir reflectance products from MODIS, *Remote Sensing of*  
 1103 *Environment*, 83, 135–148, [https://doi.org/10.1016/S0034-4257\(02\)00091-3](https://doi.org/10.1016/S0034-4257(02)00091-3), 2002.
- 1104 Schuck, T. J., Ishijima, K., Patra, P. K., Baker, A. K., Machida, T., Matsueda, H., Sawa, Y.,  
 1105 Umezawa, T., Brenninkmeijer, C. a. M., and Lelieveld, J.: Distribution of methane in the  
 1106 tropical upper troposphere measured by CARIBIC and CONTRAIL aircraft, *Journal of*  
 1107 *Geophysical Research: Atmospheres*, 117, <https://doi.org/10.1029/2012JD018199>, 2012.
- 1108 Schuldt, K. N., Mund, J., Aalto, T., Abshire, J. B., Aikin, K., Allen, G., Andrade, M., Arlyn  
 1109 Andrews, Apadula, F., Arnold, S., Baier, B., Bakwin, P., Bani, L., Bartyzel, J., Bentz, G.,  
 1110 Bergamaschi, P., Beyersdorf, A., Biermann, T., Biraud, S. C., Pierre-Eric Blanc, Boenisch,  
 1111 H., Bowling, D., Brailsford, G., Brand, W. A., Brunner, D., Bui, T. P. V., Van Den Bulk, P.,  
 1112 Benoit Burban, Francescopiero Calzolari, Chang, C. S., Chen, G., Huilin Chen, Lukasz  
 1113 Chmura, St. Clair, J. M., Clark, S., Sites Climadat, Coletta, J. D., Colomb, A., Commane, R.,  
 1114 Condori, L., Conen, F., Conil, S., Couret, C., Cristofanelli, P., Cuevas, E., Curcoll, R., Daube,  
 1115 B., Davis, K. J., Dean-Day, J. M., Delmotte, M., Dickerson, R., DiGangi, E., DiGangi, J. P.,  
 1116 Van Dinter, D., Elsasser, M., Emmenegger, L., Shuangxi Fang, Forster, G., France, J.,  
 1117 Frumau, A., Fuente-Lastra, M., Galkowski, M., Gatti, L. V., Gehrlein, T., Gerbig, C.,

- 1118 Francois Gheusi, Gloor, E., Goto, D., Griffis, T., Hammer, S., Hanisco, T. F., Hanson, C.,  
1119 Haszpra, L., Hatakka, J., Heimann, M., Heliasz, M., Heltai, D., Henne, S., Hensen, A.,  
1120 Hermans, C., Hermansen, O., Hintsa, E., Hoheisel, A., Holst, J., Di Iorio, T., Iraci, L. T.,  
1121 Ivakhov, V., Jaffe, D. A., Jordan, A., Joubert, W., Kang, H.-Y., Karion, A., Kawa, S. R.,  
1122 Kazan, V., Keeling, R. F., Keronen, P., Jooil Kim, Klausen, J., Kneuer, T., et al.: Multi-  
1123 laboratory compilation of atmospheric carbon dioxide data for the period 1957-2023;  
1124 obspack\_co2\_1\_GLOBALVIEWplus\_v10.1\_2024-11-13,  
1125 <https://doi.org/10.25925/20241101>, 2024.
- 1126 Sharma, N., Dadhwal, V. K., Kant, Y., Mahesh, P., Mallikarjun, K., Gadavi, H., Sharma, A.,  
1127 and Ali, M. M.: Atmospheric CO<sub>2</sub> Variations in Two Contrasting Environmental Sites Over  
1128 India, *Air, Soil and Water Research*, 7, ASWR.S13987,  
1129 <https://doi.org/10.4137/ASWR.S13987>, 2014.
- 1130 Sreenivas, G., Mahesh, P., Subin, J., Kanchana, A. L., Rao, P. V. N., and Dadhwal, V. K.:  
1131 Influence of Meteorology and interrelationship with greenhouse gases  
1132 (CO<sub>2</sub> and CH<sub>4</sub>) at a suburban site of India,  
1133 *Atmos. Chem. Phys.*, 16, 3953–3967, <https://doi.org/10.5194/acp-16-3953-2016>, 2016.
- 1134 Sreenivas, G., P. M., Mahalakshmi, D. V., Kanchana, A. L., Chandra, N., Patra, P. K., Raja,  
1135 P., Sesha Sai, M. V. R., Sripada, S., Rao, P. V. N., and Dadhwal, V. K.: Seasonal and annual  
1136 variations of CO<sub>2</sub> and CH<sub>4</sub> at Shadnagar, a semi-urban site, *Science of The Total  
1137 Environment*, 819, 153114, <https://doi.org/10.1016/j.scitotenv.2022.153114>, 2022.
- 1138 Srivastava, P., Bennett, M. W., Bedrosian, G., Rosenberg, R., Solish, B., and Basilio, R. R.:  
1139 Establishing Launch Readiness of NASA ISS Instrument OCO-3, in: *IGARSS 2020 - 2020  
1140 IEEE International Geoscience and Remote Sensing Symposium, IGARSS 2020 - 2020 IEEE  
1141 International Geoscience and Remote Sensing Symposium, Waikoloa, HI, USA, 6101–6104,  
1142 https://doi.org/10.1109/IGARSS39084.2020.9323631*, 2020.
- 1143 Stocker, T.F., D. Qin, G.-K. Plattner, L.V. Alexander, S.K. Allen, N.L. Bindoff, F.-M. Bréon,  
1144 J.A. Church, U. Cubasch, S. Emori, P. Forster, P. Friedlingstein, N. Gillett, J.M. Gregory,  
1145 D.L. Hartmann, E. Jansen, B. Kirtman, R. Knutti, K. Krishna Kumar, P. Lemke, J. Marotzke,  
1146 V.Masson-Delmotte, G.A. Meehl, I.I. Mokhov, S. Piao, V. Ramaswamy, D. Randall, M.  
1147 Rhein, M. Rojas, C. Sabine, D. Shindell, L.D. Talley, D.G. Vaughan and S.-P. Xie, 2013:  
1148 Technical Summary. In: *Climate Change 2013: The Physical Science Basis. Contribution of  
1149 Working Group I to the Fifth Assessment Report of the Intergovernmental Panel on Climate  
1150 Change* [Stocker, T.F., D. Qin, G.-K. Plattner, M. Tignor, S.K. Allen, J. Boschung, A.  
1151 Nauels, Y. Xia, V. Bex and P.M. Midgley (eds.)]. Cambridge University Press, Cambridge,  
1152 United Kingdom and New York, NY, USA
- 1153 Stull, R. B. (Ed.): *An Introduction to Boundary Layer Meteorology*, Springer Netherlands,  
1154 Dordrecht, <https://doi.org/10.1007/978-94-009-3027-8>, 1988.
- 1155 Summa, D., Di Girolamo, P., Stelitalo, D., and Cacciani, M.: Characterization of the  
1156 planetary boundary layer height and structure by Raman lidar: comparison of different  
1157 approaches, *Atmospheric Measurement Techniques*, 6, 3515–3525,  
1158 <https://doi.org/10.5194/amt-6-3515-2013>, 2013.
- 1159 Sun, Y., Frankenberg, C., Jung, M., Joiner, J., Guanter, L., Köhler, P., and Magney, T.:  
1160 Overview of Solar-Induced chlorophyll Fluorescence (SIF) from the Orbiting Carbon

- 1161 Observatory-2: Retrieval, cross-mission comparison, and global monitoring for GPP, Remote  
1162 Sensing of Environment, 209, 808–823, <https://doi.org/10.1016/j.rse.2018.02.016>, 2018.
- 1163 Thilakan, V., Pillai, D., Sukumaran, J., Gerbig, C., Hakkim, H., Sinha, V., Terao, Y., Naja,  
1164 M., and Deshpande, M. V.: Potential of using CO<sub>2</sub> observations over India in regional carbon  
1165 budget estimation by improving the modelling system, EGU sphere, 1–32,  
1166 <https://doi.org/10.5194/egusphere-2023-1582>, 2023.
- 1167 Tiwari, Y., Valsala, V., Vellore, R., and Kunchala, R.: Effectiveness of surface monitoring  
1168 stations in representing regional CO<sub>2</sub> emissions over India, Clim. Res., 56, 121–129,  
1169 <https://doi.org/10.3354/cr01149>, 2013.
- 1170 Tiwari, Y. K., Vellore, R. K., Ravi Kumar, K., Van Der Schoot, M., and Cho, C.-H.:  
1171 Influence of monsoons on atmospheric CO<sub>2</sub> spatial variability and ground-based monitoring  
1172 over India, Science of The Total Environment, 490, 570–578,  
1173 <https://doi.org/10.1016/j.scitotenv.2014.05.045>, 2014.
- 1174 Vermote, E. and NOAA CDR Program: NOAA Climate Data Record (CDR) of AVHRR  
1175 Normalized Difference Vegetation Index (NDVI), Version 5,  
1176 <https://doi.org/10.7289/V5ZG6QH9>, 2018.
- 1177 Wada, A., Matsueda, H., Sawa, Y., Tsuboi, K., and Okubo, S.: Seasonal variation of  
1178 enhancement ratios of trace gases observed over 10 years in the western North Pacific,  
1179 Atmospheric Environment, 45, 2129–2137, <https://doi.org/10.1016/j.atmosenv.2011.01.043>,  
1180 2011.
- 1181 Wang, G., Huang, J., Guo, W., Zuo, J., Wang, J., Bi, J., Huang, Z., and Shi, J.: Observation  
1182 analysis of land-atmosphere interactions over the Loess Plateau of northwest China, Journal  
1183 of Geophysical Research: Atmospheres, 115, <https://doi.org/10.1029/2009JD013372>, 2010.
- 1184 Wang, Z., Schaaf, C. B., Sun, Q., Shuai, Y., and Román, M. O.: Capturing rapid land surface  
1185 dynamics with Collection V006 MODIS BRDF/NBAR/Albedo (MCD43) products, Remote  
1186 Sensing of Environment, 207, 50–64, <https://doi.org/10.1016/j.rse.2018.02.001>, 2018.
- 1187 Watanabe, S., Miura, H., Sekiguchi, M., Nagashima, T., Sudo, K., Emori, S., and Kawamiya,  
1188 M.: Development of an atmospheric general circulation model for integrated Earth system  
1189 modeling on the Earth Simulator, Earth Simulator, 9, 27–35, 2008.
- 1190 Wigley, T. M. L. (1983). The pre-industrial carbon dioxide level. *Climatic change*, 5(4), 315-  
1191 320.
- 1192 Worthy, D. E. J., Chan, E., Ishizawa, M., Chan, D., Poss, C., Dlugokencky, E. J., Maksyutov,  
1193 S., and Levin, I.: Decreasing anthropogenic methane emissions in Europe and Siberia inferred  
1194 from continuous carbon dioxide and methane observations at Alert, Canada, Journal of  
1195 Geophysical Research: Atmospheres, 114, <https://doi.org/10.1029/2008JD011239>, 2009.
- 1196 Xiao, Y., Jacob, D. J., Wang, J. S., Logan, J. A., Palmer, P. I., Suntharalingam, P., Yantosca,  
1197 R. M., Sachse, G. W., Blake, D. R., and Streets, D. G.: Constraints on Asian and European  
1198 sources of methane from CH<sub>4</sub>-C<sub>2</sub>H<sub>6</sub>-CO correlations in Asian outflow, J. Geophys. Res.,  
1199 109, 2003JD004475, <https://doi.org/10.1029/2003JD004475>, 2004.

- 1200 Xiong, X., Houweling, S., Wei, J., Maddy, E., Sun, F., and Barnet, C.: Methane plume over  
1201 south Asia during the monsoon season: satellite observation and model simulation,  
1202 Atmospheric Chemistry and Physics, 9, 783–794, <https://doi.org/10.5194/acp-9-783-2009>,  
1203 2009.
- 1204 Yoro, K. O. and Daramola, M. O.: CO<sub>2</sub> emission sources, greenhouse gases, and the global  
1205 warming effect, in: Advances in Carbon Capture, Elsevier, 3–28,  
1206 <https://doi.org/10.1016/B978-0-12-819657-1.00001-3>, 2020.
- 1207 Yuan, Y., Ries, L., Petermeier, H., Steinbacher, M., Gómez-Peláez, A. J., Leuenberger, M.  
1208 C., Schumacher, M., Trickl, T., Couret, C., Meinhardt, F., and Menzel, A.: Adaptive selection  
1209 of diurnal minimum variation: a statistical strategy to obtain representative atmospheric CO<sub>2</sub>  
1210 data and its application to European elevated mountain stations, Atmospheric Measurement  
1211 Techniques, 11, 1501–1514, <https://doi.org/10.5194/amt-11-1501-2018>, 2018.
- 1212 Zhang, H. F., Chen, B. Z., van der Laan-Luijk, I. T., Machida, T., Matsueda, H., Sawa, Y.,  
1213 Fukuyama, Y., Langenfelds, R., van der Schoot, M., Xu, G., Yan, J. W., Cheng, M. L., Zhou,  
1214 L. X., Tans, P. P., and Peters, W.: Estimating Asian terrestrial carbon fluxes from  
1215 CONTRAIL aircraft and surface CO<sub>2</sub> observations for the period 2006–2010,  
1216 Atmospheric Chemistry and Physics, 14, 5807–5824, [https://doi.org/10.5194/acp-14-5807-](https://doi.org/10.5194/acp-14-5807-2014)  
1217 2014, 2014.
- 1218 Zhang, X., Nakazawa, T., Ishizawa, M., Aoki, S., Nakaoka, S.-I., Sugawara, S., Maksyutov,  
1219 S., Saeki, T., and Hayasaka, T.: Temporal variations of atmospheric carbon dioxide in the  
1220 southernmost part of Japan, Tellus B: Chemical and Physical Meteorology, 59, 654–663,  
1221 <https://doi.org/10.1111/j.1600-0889.2007.00288.x>, 2007.
- 1222
