# Supplementary material for: Insights into the high temporal variability of atmospheric carbon dioxide (CO 2 ) at a suburban station in the Indo-Gangetic Plain
Source: Copernicus journal article supplement (doi:10.5194/egusphere-2025-3538), 2025-09-29
Supplement: Supplementary file 2 [file egusphere-2025-3538-supplement.pdf]

***Supporting information for “Insights into the high temporal variability of atmospheric carbon dioxide (CO<sub>2</sub>) over a suburban station in the Indo-Gangetic Plain”***

Vimal Jose Vazhathara<sup>1, \*</sup>, Ravi Kumar Kunchala<sup>1</sup>, Sajeev Philip<sup>1</sup>, Jaswant Rathore<sup>1</sup>, Dilip Ganguly<sup>1</sup>, Sagnik Dey<sup>1,2</sup>, Yutaka Matsumi<sup>3,4</sup> and Prabir K. Patra<sup>3,5</sup>

<sup>1</sup>Centre for Atmospheric Sciences, Indian Institute of Technology Delhi, New Delhi, India.

<sup>2</sup>Centre of Excellence for Research on Clean Air, Indian Institute of Technology Delhi, New Delhi, India

<sup>3</sup>Research Institute for Humanity and Nature, Kyoto, Japan

<sup>4</sup>Institute for Space-Earth Environmental Research, Nagoya University, Nagoya, Japan

<sup>5</sup>Japan Agency for Marine-Earth Science and Technology (JAMSTEC), Yokohama, Japan.

\*Correspondence to: Vimal Jose Vazhathara (vimaljosevazhathara@gmail.com), Centre for Atmospheric Sciences, Indian Institute of Technology Delhi, New Delhi, 110016, India

This Supporting Information file contains 1 section, 6 figures and 3 tables in 11 pages.

## S1. Calibration details

The Picarro G2301 analyser was calibrated using four NOAA-certified primary standard cylinders containing known concentrations of CO<sub>2</sub> and CH<sub>4</sub> (Table S3). Each cylinder was sampled for 15 minutes in an ascending concentration sequence, repeated twice (Figure S6), resulting in a total measurement time of 30 minutes per cylinder over a 2-hour session. An automated multiport valve controller handled the switching between cylinders to ensure consistency and reduce manual error, while also testing the instrument's stability during calibration. Minute averages and standard deviations were calculated after excluding the initial 3–4 minutes of each run to allow for stabilisation (Laurent, 2016). Only minute averages with standard deviations below 0.04 ppm for CO<sub>2</sub> and 0.0004 ppm for CH<sub>4</sub> were used. These were averaged first per sequence and then across sequences to determine final mean values and standard deviations for each cylinder.

A weighted least squares regression was used to generate a linear calibration curve of the form:

$$Y = a_0 + (a_1 \times x) \quad (1)$$

where  $x$  is the certified concentration (NOAA value) and  $y$  is the analyser's reading. For correcting measured values, the inverse was applied:

$$X = \frac{(y-a_0)}{a_1} \quad (2)$$

The four standard cylinders were chosen to cover the expected concentration range at the site, and the primary calibration was performed annually.

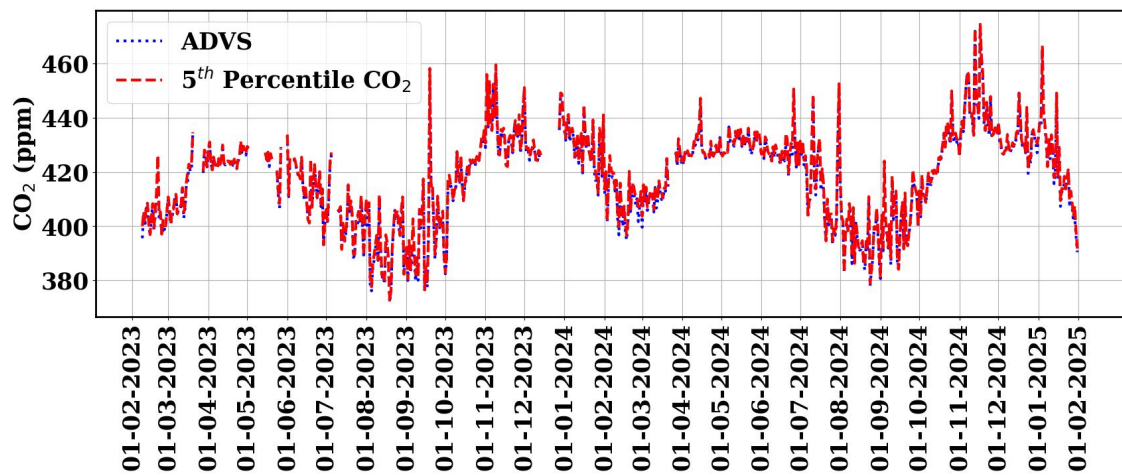

**Figure S1:** Comparison of background concentrations of atmospheric CO<sub>2</sub> estimated using the Adaptive Diurnal Variation Selection (ADVS) method and the fifth percentile method for the study period.

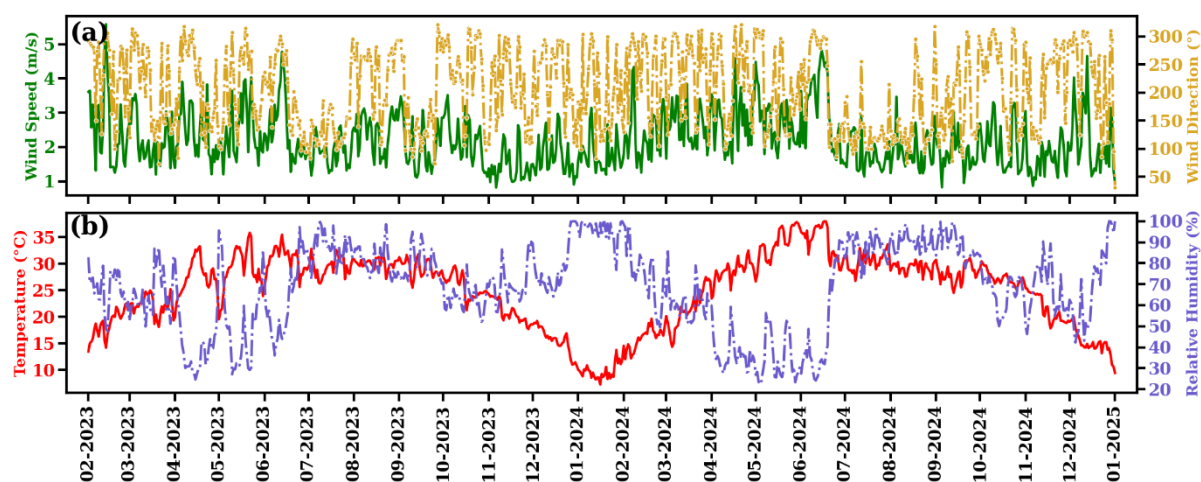

**Figure S2:** Daily variation in meteorological parameters (wind speed, wind direction, air temperature and relative humidity) over Sonipat during the study period. All measurements have been made using the Automatic Weather Station (AWS) in Sonipat.

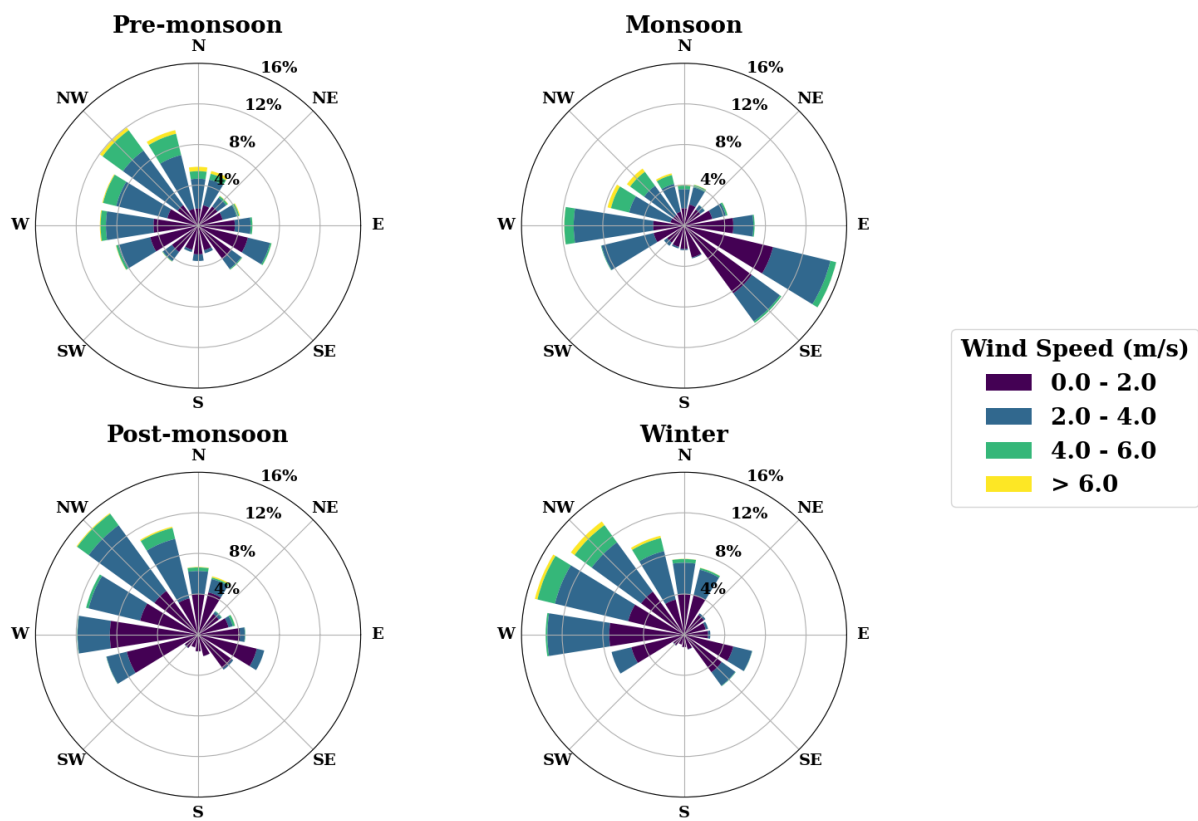

**Figure S3:** Seasonal variation in the wind pattern over Sonipat during the study period.

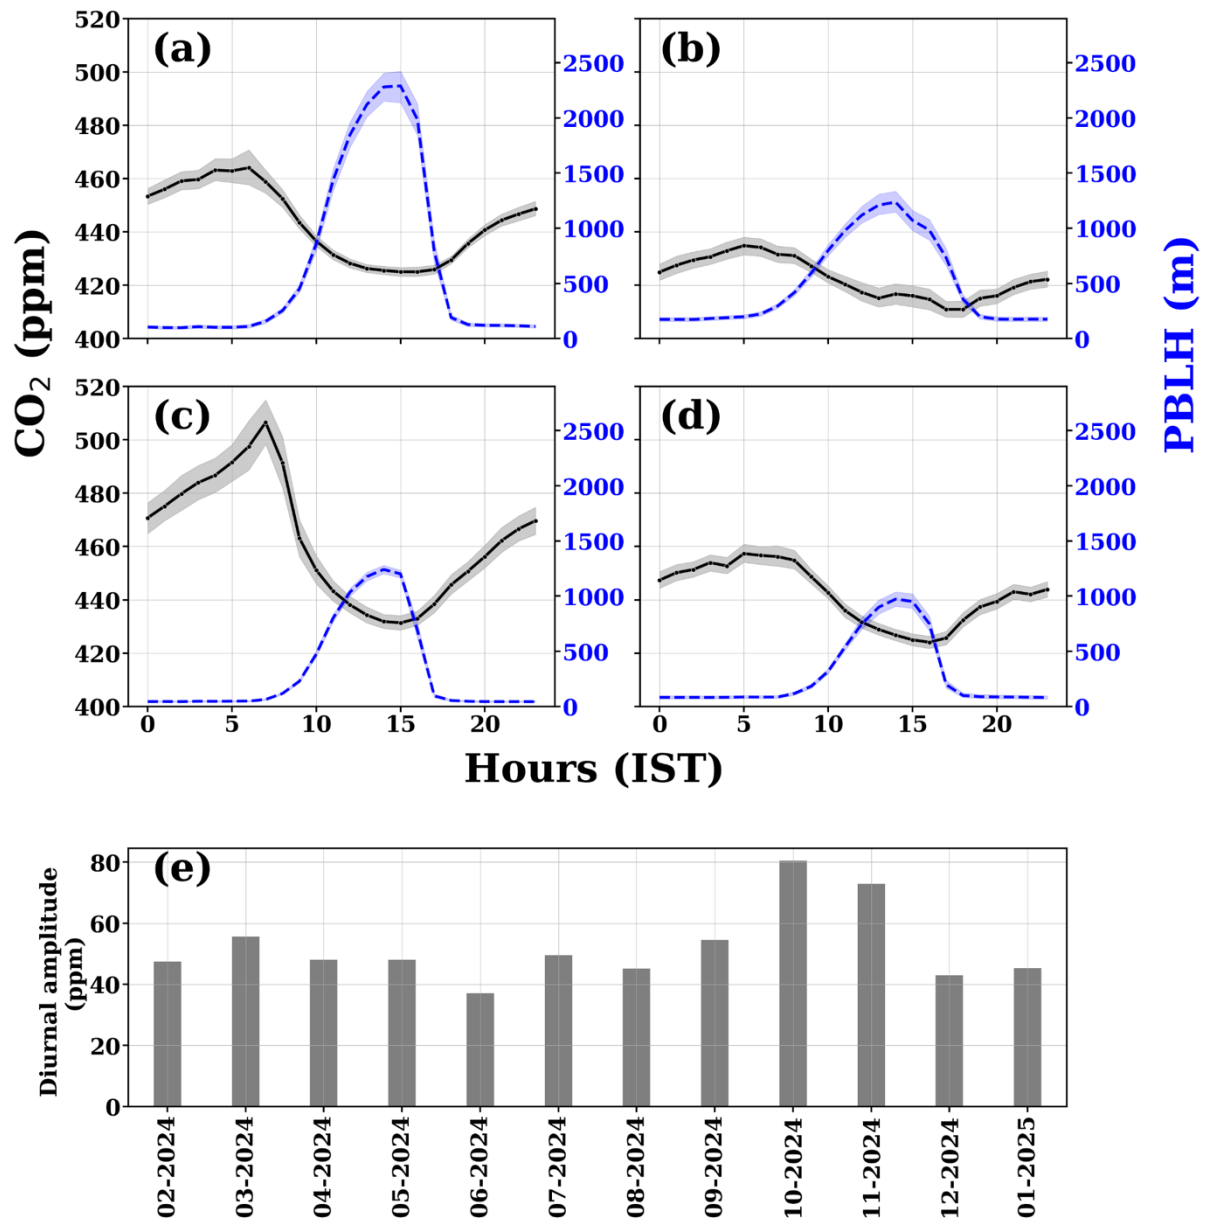

**Figure S4:** (a - d) Average diurnal variation of CO<sub>2</sub> over Sonipat during the pre-monsoon (MAM), monsoon (JJAS), post-monsoon (ON) and winter (DJF) seasons with planetary boundary layer height (blue), (e) monthly variation of the average diurnal amplitude of CO<sub>2</sub> from February 2024 to January 2025.

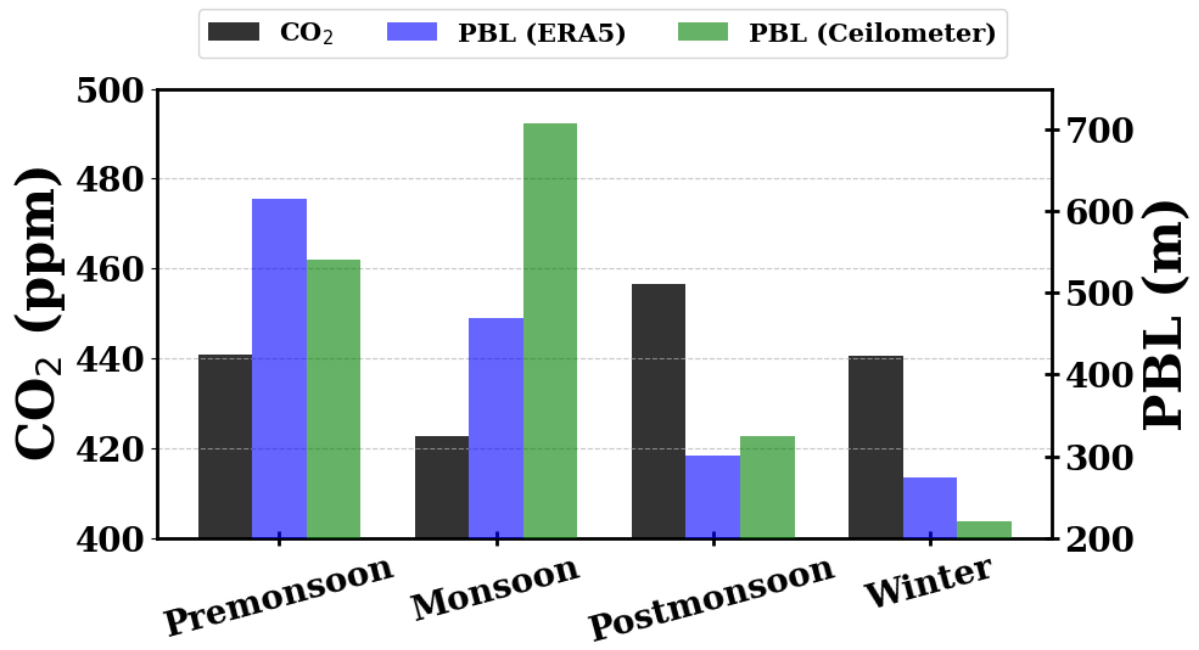

**Figure S5:** Comparison of seasonal means of atmospheric CO<sub>2</sub> concentrations with PBLH over Sonipat.

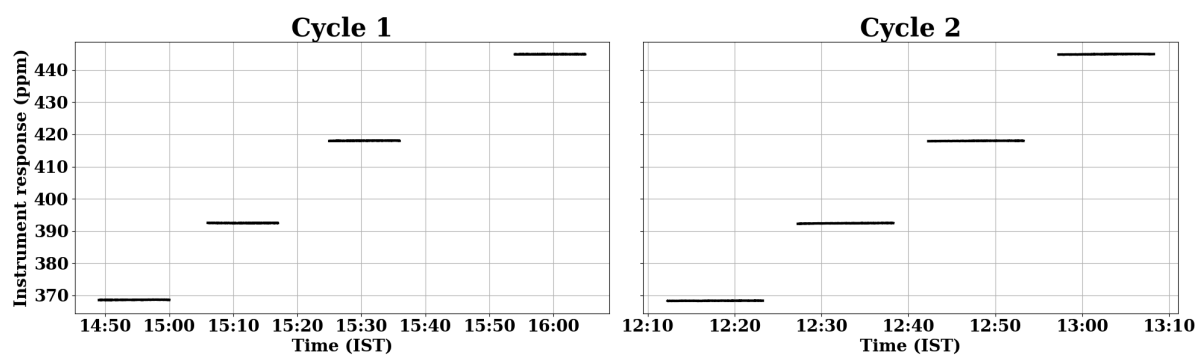

**Figure S6:** Calibration procedure using four NOAA-certified standard gases for CO<sub>2</sub> and CH<sub>4</sub>.



**Table S1:** Annual, seasonal mean, and seasonal variation of the average diurnal amplitude of CO<sub>2</sub> over Sonipat during the study period compared with other study sites over India. Seasons have been defined as pre-monsoon (MAM), monsoon (JJAS), post-monsoon (ON), and winter (DJF).

| Location                 | Site       | Study Period        | Reference              | Annual Mean (ppm) | Pre-monsoon |                         | Monsoon    |                         | Post-monsoon |                         | Winter     |                         |
|--------------------------|------------|---------------------|------------------------|-------------------|-------------|-------------------------|------------|-------------------------|--------------|-------------------------|------------|-------------------------|
|                          |            |                     |                        |                   | Mean (ppm)  | Diurnal Amplitude (ppm) | Mean (ppm) | Diurnal Amplitude (ppm) | Mean (ppm)   | Diurnal Amplitude (ppm) | Mean (ppm) | Diurnal Amplitude (ppm) |
| Sonipat, Haryana         | Semi-urban | Feb 2023 – Jan 2025 | This study             | 436.8             | 440.8       | 49.9                    | 422.6      | 46.3                    | 456.4        | 69.6                    | 440.5      | 44.5                    |
| Mohali, Punjab*          | Semi-urban | Jan 2017 – Dec 2017 | Thilakan et al., 2023  | 428.8             | ~ 409.0     |                         | ~ 400.2    |                         | ~ 417.5      |                         | 406.7      |                         |
| Ahmedabad, Gujarat*      | Urban      | Nov 2013 – May 2015 | Chandra et al., 2016   | 413.0             | ~ 413.3     | ~ 10.0                  | ~ 401.7    | ~ 10.0                  | ~ 422.5      | ~ 40.0                  | ~ 420.0    | ~ 30.0                  |
| Sinhagad, Maharashtra    | Semi-urban | Jul 2014 – Nov 2015 | Metya et al., 2021     | 406.1             | 416.9       | 2.8                     | 400.2      | 10.0                    | 401.8        | 4.1                     | 409.9      | 1.9                     |
| Shadnagar, Telangana**   | Semi-urban | Jan 2014 – Dec 2014 | Sreenivas et al., 2016 | 394.0             | ~ 394.5     | ~ 25.0                  | ~ 386.3    | ~ 15.0                  | ~ 386.5      | ~ 17.0                  | ~ 383.5    | ~ 15.0                  |
| Gadanki, Andhra Pradesh* | Rural      | Apr 2016 – Apr 2019 | Jain et al., 2021      | 420.0             | 419.8       | ~ 20.0                  | 414.2      | ~ 23.0                  | 423.7        | ~ 55.0                  | 421.8      | ~ 35.0                  |

\* Monsoon has been defined as JJA, and post-monsoon has been defined as SON.

\*\* Post-monsoon has been defined as OND.

**Table S2:** Seasonal amplitude of CO<sub>2</sub>, peak, and draw-down months over Sonipat during the study period compared with other study sites over India. Seasons have been defined as pre-monsoon (MAM), monsoon (JJAS), post-monsoon (ON), and winter (DJF).

| Location                 | Site       | Study Period        | Reference              | CO <sub>2</sub> Peak (month) (ppm) | CO <sub>2</sub> Draw-down (month) (ppm) | Seasonal Amplitude (ppm) |
|--------------------------|------------|---------------------|------------------------|------------------------------------|-----------------------------------------|--------------------------|
| Sonipat, Haryana         | Semi-urban | Feb 2023 – Jan 2025 | This study             | 470 (November)                     | 410 (August)                            | 60                       |
| Mohali, Punjab*          | Semi-urban | Jan 2017 – Dec 2017 | Thilakan et al., 2023  | 420 (November)                     | 390 (August)                            | 30                       |
| Ahmedabad, Gujarat*      | Urban      | Nov 2013 – May 2015 | Chandra et al., 2016   | 425 (November)                     | 390 (July)                              | 35                       |
| Sinhagad, Maharashtra    | Semi-urban | Jul 2014 - Nov 2015 | Metya et al., 2021     | 428 (May)                          | 398 (October)                           | 30                       |
| Shadnagar, Telangana**   | Semi-urban | Jan 2014 – Dec 2014 | Sreenivas et al., 2016 | 405 (September)                    | 390 (May)                               | 15                       |
| Gadanki, Andhra Pradesh* | Rural      | Apr 2016 – Apr 2019 | Jain et al., 2021      | 425 (November)                     | 405 (August)                            | 20                       |

82 **Table S3:** Details of the calibration using the NOAA cylinders.

|                |                       | Reference value          |                          | Measured value           |                          |
|----------------|-----------------------|--------------------------|--------------------------|--------------------------|--------------------------|
|                | Cylinder<br>serial no | CO <sub>2</sub><br>(ppm) | CH <sub>4</sub><br>(ppb) | CO <sub>2</sub><br>(ppm) | CH <sub>4</sub><br>(ppb) |
| <b>Cycle 1</b> | CY1:-CB11849          | 370                      | 1720                     | 368.61 ± 0.03            | 1743.4 ± 0.2             |
|                | CY2:-CB11881          | 395                      | 1837                     | 392.47 ± 0.03            | 1844.2 ± 0.2             |
|                | CY3:-CB11841          | 420                      | 1880                     | 418.05 ± 0.04            | 1899.3 ± 0.2             |
|                | CY4:-CB11973          | 450                      | 2100                     | 444.90 ± 0.02            | 2104.1 ± 0.2             |
| <b>Cycle 2</b> | CY1:-CB11849          | 370                      | 1720                     | 368.33 ± 0.03            | 1743.4 ± 0.2             |
|                | CY2:-CB11881          | 395                      | 1837                     | 392.39 ± 0.06            | 1844.0 ± 0.1             |
|                | CY3:-CB11841          | 420                      | 1880                     | 417.99 ± 0.05            | 1899.3 ± 0.1             |
|                | CY4:-CB11973          | 450                      | 2100                     | 444.91 ± 0.06            | 2104.1 ± 0.2             |

83

84
